# Supplementary material for: The impact of cash transfers on mental health in children and young people in low-income and middle-income countries: a systematic review and meta-analysis
Source: PubMed Central journal article supplement — BMJ Glob Health. 2021 Apr 27;6(4):e004661. doi: 10.1136/bmjgh-2020-004661 (PMC8088245; doi:10.1136/bmjgh-2020-004661), 2021-04-27
Supplement: bmjgh-2020-004661supp001.pdf [file bmjgh-2020-004661supp001.pdf]

## Supplementary

## Search strategy for PUBMED (MEDLINE), 2000 to Present.

Key concepts: LMIC, cash transfer schemes, mental health, controlled designs

| Concept | Keywords                                                                                                                                                                                                                                                                                                                                                                                                                                                                                                                                                                                                                                                                                                                                                                                                                                                                                                                                                                                                                                                                                                                                                                                                                                                                                                                                                                                                                                                                                                                                                                                                                                                                                                                                                                                                                                                                                                                                                                                                                                                                                                                                                                                                                                                                                                                                                                                                                                                                                                                                                                                                                                                                                                                                                                                                                                                                                                                                                                                                                                                                                                                                                                                                                                                                                                                                                                                                                                                                                                                                                     |
|---------|--------------------------------------------------------------------------------------------------------------------------------------------------------------------------------------------------------------------------------------------------------------------------------------------------------------------------------------------------------------------------------------------------------------------------------------------------------------------------------------------------------------------------------------------------------------------------------------------------------------------------------------------------------------------------------------------------------------------------------------------------------------------------------------------------------------------------------------------------------------------------------------------------------------------------------------------------------------------------------------------------------------------------------------------------------------------------------------------------------------------------------------------------------------------------------------------------------------------------------------------------------------------------------------------------------------------------------------------------------------------------------------------------------------------------------------------------------------------------------------------------------------------------------------------------------------------------------------------------------------------------------------------------------------------------------------------------------------------------------------------------------------------------------------------------------------------------------------------------------------------------------------------------------------------------------------------------------------------------------------------------------------------------------------------------------------------------------------------------------------------------------------------------------------------------------------------------------------------------------------------------------------------------------------------------------------------------------------------------------------------------------------------------------------------------------------------------------------------------------------------------------------------------------------------------------------------------------------------------------------------------------------------------------------------------------------------------------------------------------------------------------------------------------------------------------------------------------------------------------------------------------------------------------------------------------------------------------------------------------------------------------------------------------------------------------------------------------------------------------------------------------------------------------------------------------------------------------------------------------------------------------------------------------------------------------------------------------------------------------------------------------------------------------------------------------------------------------------------------------------------------------------------------------------------------------------|
| LMIC    | developing country[Title/Abstract] OR less developed country[Title/Abstract] OR third world country[Title/Abstract] OR under developed country[Title/Abstract] OR middle income country[Title/Abstract] OR low income country[Title/Abstract] OR middle-income country[Title/Abstract] OR low-income country[Title/Abstract] OR underserved country[Title/Abstract] OR under served country[Title/Abstract] OR deprived country[Title/Abstract] OR poor country[Title/Abstract] OR poorer country[Title/Abstract] OR poorest country[Title/Abstract] OR developing countries[Title/Abstract] OR less developed countries[Title/Abstract] OR third world countries[Title/Abstract] OR under developed countries[Title/Abstract] OR middle income countries[Title/Abstract] OR low income countries[Title/Abstract] OR middle-income countries[Title/Abstract] OR underserved countries[Title/Abstract] OR under served countries[Title/Abstract] OR deprived countries[Title/Abstract] OR poor countries[Title/Abstract] OR poorer countries[Title/Abstract] OR poorest countries[Title/Abstract] OR developing nation[Title/Abstract] OR less developed nation[Title/Abstract] OR third world nation[Title/Abstract] OR under developed nation[Title/Abstract] OR middle income nation[Title/Abstract] OR low income nation[Title/Abstract] OR middle-income nation[Title/Abstract] OR low-income nation[Title/Abstract] OR underserved nation[Title/Abstract] OR under served nation[Title/Abstract] OR deprived nation[Title/Abstract] OR poor nation[Title/Abstract] OR poorer nation[Title/Abstract] OR poorest nation[Title/Abstract] OR developing nations[Title/Abstract] OR less developed nations[Title/Abstract] OR third world nations[Title/Abstract] OR under developed nations[Title/Abstract] OR middle income nations[Title/Abstract] OR low income nations[Title/Abstract] OR middle-income nations[Title/Abstract] OR low-income nations[Title/Abstract] OR underserved nations[Title/Abstract] OR under served nations[Title/Abstract] OR deprived nations[Title/Abstract] OR poor nations[Title/Abstract] OR poorer nations[Title/Abstract] OR poorest nations[Title/Abstract] OR developing state[Title/Abstract] OR less developed state[Title/Abstract] OR third world state[Title/Abstract] OR under developed state[Title/Abstract] OR middle income state[Title/Abstract] OR low income state[Title/Abstract] OR middle-income state[Title/Abstract] OR low-income state[Title/Abstract] OR underserved state[Title/Abstract] OR under served state[Title/Abstract] OR deprived state[Title/Abstract] OR poor state[Title/Abstract] OR poorer state[Title/Abstract] OR poorest state[Title/Abstract] OR developing states[Title/Abstract] OR less developed states[Title/Abstract] OR third world states[Title/Abstract] OR under developed states[Title/Abstract] OR middle income states[Title/Abstract] OR low income states[Title/Abstract] OR middle-income states[Title/Abstract] OR low-income states[Title/Abstract] OR underserved states[Title/Abstract] OR under served states[Title/Abstract] OR deprived states[Title/Abstract] OR poor states[Title/Abstract] OR poorer states[Title/Abstract] OR poorest states[Title/Abstract] OR developing population[Title/Abstract] OR less developed population[Title/Abstract] OR third world population[Title/Abstract] OR under developed population[Title/Abstract] OR middle income population[Title/Abstract] OR low income population[Title/Abstract] OR middle-income |

population[Title/Abstract] OR low-income population[Title/Abstract] OR underserved population[Title/Abstract] OR under served population[Title/Abstract] OR deprived population[Title/Abstract] OR poor population[Title/Abstract] OR poorer population[Title/Abstract] OR poorest population[Title/Abstract] OR developing populations[Title/Abstract] OR less developed populations[Title/Abstract] OR third world populations[Title/Abstract] OR under developed populations[Title/Abstract] OR middle income populations[Title/Abstract] OR low income populations[Title/Abstract] OR middle-income populations[Title/Abstract] OR low-income populations[Title/Abstract] OR underserved populations[Title/Abstract] OR under served populations[Title/Abstract] OR deprived populations[Title/Abstract] OR poor populations[Title/Abstract] OR poorer populations[Title/Abstract] OR poorest populations[Title/Abstract] OR LMIC[Title/Abstract] OR LMICs[Title/Abstract] OR LMICS[Title/Abstract] OR LAMIC[Title/Abstract] OR poor[Title/Abstract] OR deprived[Title/Abstract] OR South America[Title/Abstract] OR Latin America[Title/Abstract] OR Latin Americas[Title/Abstract] OR Latin American[Title/Abstract] OR Central America[Title/Abstract] OR Central American[Title/Abstract] OR Africa[Title/Abstract] OR African[Title/Abstract] OR Asia[Title/Abstract] OR Asian[Title/Abstract] OR Afghanistan[Title/Abstract] OR Afghan[Title/Abstract] OR Albania[Title/Abstract] OR Albanian[Title/Abstract] OR Algeria[Title/Abstract] OR Algerian[Title/Abstract] OR American Samoa[Title/Abstract] OR Angola[Title/Abstract] OR Angolan[Title/Abstract] OR Antigua and Barbuda[Title/Abstract] OR Antiguans[Title/Abstract] OR Barbudans[Title/Abstract] OR Argentina[Title/Abstract] OR Argentine[Title/Abstract] OR Armenia[Title/Abstract] OR Armenian[Title/Abstract] OR Azerbaijan[Title/Abstract] OR Azerbaijani[Title/Abstract] OR Bahrain[Title/Abstract] OR Bahraini[Title/Abstract] OR Bangladesh[Title/Abstract] OR Bangladeshi[Title/Abstract] OR Barbados[Title/Abstract] OR Barbadian[Title/Abstract] OR Belarus[Title/Abstract] OR Belarusian[Title/Abstract] OR Belize[Title/Abstract] OR Belizean[Title/Abstract] OR Benin[Title/Abstract] OR Beninese[Title/Abstract] OR Bhutan[Title/Abstract] OR Bhutanese[Title/Abstract] OR Bolivia[Title/Abstract] OR Bolivian[Title/Abstract] OR Bosnia[Title/Abstract] OR Bosnian[Title/Abstract] OR Herzegovina[Title/Abstract] OR Herzegovinian[Title/Abstract] OR Bosnia and Herzegovina[Title/Abstract] OR Botswana[Title/Abstract] OR Batswana[Title/Abstract] OR Brazil[Title/Abstract] OR Brazilian[Title/Abstract] OR Bulgaria[Title/Abstract] OR Bulgarian[Title/Abstract] OR Burkina[Title/Abstract] OR Burkinabe[Title/Abstract] OR Burma[Title/Abstract] OR Burmese[Title/Abstract] OR Burundi[Title/Abstract] OR Burundian[Title/Abstract] OR Cape Verde[Title/Abstract] OR Cape Verdian[Title/Abstract] OR Cambodia[Title/Abstract] OR Cambodian[Title/Abstract] OR Cameroon[Title/Abstract] OR Cameroonian[Title/Abstract] OR Central African Republic[Title/Abstract] OR Central African[Title/Abstract] OR Chad[Title/Abstract] OR Chadian[Title/Abstract] OR Chile[Title/Abstract] OR Chilean[Title/Abstract] OR China[Title/Abstract] OR Chinese[Title/Abstract] OR Colombia[Title/Abstract] OR Colombian[Title/Abstract] OR Comoros[Title/Abstract] OR Comoran[Title/Abstract] OR Congo[Title/Abstract] OR Congolese[Title/Abstract] OR Costa Rica[Title/Abstract] OR Costa Rican[Title/Abstract] OR Côte d'Ivo\*[Title/Abstract] OR Cote d'Ivo\*[Title/Abstract] OR

|                                                                                                                                                                                                                                                                                                                                                                                                                                                                                                                                                                                                                                                                                                                                                                                                                                                                                                                                                                                                                                                                                                                                                                                                                                                                                                                                                                                                                                                                                                                                                                                                                                                                                                                                                                                                                                                                                                                                                                                                                                                                                                                                                                                                                                                                                                                                                                                                                                                                                                                                                                                                                                                                                                                                                                                                                                                                                                                                                                                                                                                                                                                                                                                                                                                                                                                                                                                                                                                                                                                                                                               |
|-------------------------------------------------------------------------------------------------------------------------------------------------------------------------------------------------------------------------------------------------------------------------------------------------------------------------------------------------------------------------------------------------------------------------------------------------------------------------------------------------------------------------------------------------------------------------------------------------------------------------------------------------------------------------------------------------------------------------------------------------------------------------------------------------------------------------------------------------------------------------------------------------------------------------------------------------------------------------------------------------------------------------------------------------------------------------------------------------------------------------------------------------------------------------------------------------------------------------------------------------------------------------------------------------------------------------------------------------------------------------------------------------------------------------------------------------------------------------------------------------------------------------------------------------------------------------------------------------------------------------------------------------------------------------------------------------------------------------------------------------------------------------------------------------------------------------------------------------------------------------------------------------------------------------------------------------------------------------------------------------------------------------------------------------------------------------------------------------------------------------------------------------------------------------------------------------------------------------------------------------------------------------------------------------------------------------------------------------------------------------------------------------------------------------------------------------------------------------------------------------------------------------------------------------------------------------------------------------------------------------------------------------------------------------------------------------------------------------------------------------------------------------------------------------------------------------------------------------------------------------------------------------------------------------------------------------------------------------------------------------------------------------------------------------------------------------------------------------------------------------------------------------------------------------------------------------------------------------------------------------------------------------------------------------------------------------------------------------------------------------------------------------------------------------------------------------------------------------------------------------------------------------------------------------------------------------------|
| Ivorian[Title/Abstract] OR Croatia[Title/Abstract] OR Croatian[Title/Abstract] OR Cuba[Title/Abstract] OR Cuban[Title/Abstract] OR Czech[Title/Abstract] OR Djibouti[Title/Abstract] OR Dominican[Title/Abstract] OR Ecuador[Title/Abstract] OR Ecuadorean[Title/Abstract] OR Egypt[Title/Abstract] OR Egyptian[Title/Abstract] OR El Salvador[Title/Abstract] OR Salvadorian[Title/Abstract] OR Equatorial Guinea[Title/Abstract] OR Equatorial Guinean[Title/Abstract] OR Equatoguinean[Title/Abstract] OR Eritrea[Title/Abstract] OR Eritrean[Title/Abstract] OR Estonia[Title/Abstract] OR Estonian[Title/Abstract] OR eSwatini[Title/Abstract] OR iSwati[Title/Abstract] OR Ethiopia[Title/Abstract] OR Ethiopian[Title/Abstract] OR Fiji[Title/Abstract] OR Fijian[Title/Abstract] OR Gabon[Title/Abstract] OR Gabonese[Title/Abstract] OR Gambia[Title/Abstract] OR Gambian[Title/Abstract] OR Georgia[Title/Abstract] OR Georgian[Title/Abstract] OR Ghana[Title/Abstract] OR Ghanaian[Title/Abstract] OR Grenada[Title/Abstract] OR Grenadian[Title/Abstract] OR Guatemala[Title/Abstract] OR Guatemalan[Title/Abstract] OR Guinea[Title/Abstract] OR Guinean[Title/Abstract] OR Guinea-Bissau[Title/Abstract] OR Guinea-Bissauan[Title/Abstract] OR Guyana[Title/Abstract] OR Guyanese[Title/Abstract] OR Haiti[Title/Abstract] OR Haitian[Title/Abstract] OR Honduras[Title/Abstract] OR Honduran[Title/Abstract] OR Hungary[Title/Abstract] OR Hungarian[Title/Abstract] OR India[Title/Abstract] OR Indian[Title/Abstract] OR Indonesia[Title/Abstract] OR Indonesian[Title/Abstract] OR Iran[Title/Abstract] OR Iranian[Title/Abstract] OR Islamic Republic[Title/Abstract] OR Iraq[Title/Abstract] OR Iraqi[Title/Abstract] OR Jamaica[Title/Abstract] OR Jamaican[Title/Abstract] OR Jordan[Title/Abstract] OR Jordanian[Title/Abstract] OR Kazakhstan[Title/Abstract] OR Kazakhstani[Title/Abstract] OR Kenya[Title/Abstract] OR Kenyan[Title/Abstract] OR Kiribati[Title/Abstract] OR I-Kiribati[Title/Abstract] OR Koran[Title/Abstract] OR Korean[Title/Abstract] OR Kosovo[Title/Abstract] OR Kosovar[Title/Abstract] OR Kyrgyz Republic[Title/Abstract] OR Kyrgyz[Title/Abstract] OR Kyrgyzstani[Title/Abstract] OR Laos[Title/Abstract] OR Lao[Title/Abstract] OR Laotian[Title/Abstract] OR Latvia[Title/Abstract] OR Latvian[Title/Abstract] OR Lebanon[Title/Abstract] OR Lebanese[Title/Abstract] OR Lesotho[Title/Abstract] OR Mosotho[Title/Abstract] OR Liberia[Title/Abstract] OR Liberian[Title/Abstract] OR Libya[Title/Abstract] OR Libyan[Title/Abstract] OR Lithuania[Title/Abstract] OR Lithuanian[Title/Abstract] OR Madagascar[Title/Abstract] OR Malagasy[Title/Abstract] OR Malawi[Title/Abstract] OR Malawian[Title/Abstract] OR Malaysia[Title/Abstract] OR Malaysian[Title/Abstract] OR Maldives[Title/Abstract] OR Maldivian[Title/Abstract] OR Mali[Title/Abstract] OR Malian[Title/Abstract] OR Malta[Title/Abstract] OR Maltese[Title/Abstract] OR Marshall Islands[Title/Abstract] OR Marshallese[Title/Abstract] OR Mauritania[Title/Abstract] OR Mauritanian[Title/Abstract] OR Mauritius[Title/Abstract] OR Mauritian[Title/Abstract] OR Mayotte[Title/Abstract] OR Mahorais[Title/Abstract] OR Mexico[Title/Abstract] OR Mexican[Title/Abstract] OR Micronesia[Title/Abstract] OR Micronesian[Title/Abstract] OR Moldova[Title/Abstract] OR Moldovan[Title/Abstract] OR Mongolia[Title/Abstract] OR Mongolian[Title/Abstract] OR Montenegro[Title/Abstract] OR Montenegrin[Title/Abstract] OR Morocco[Title/Abstract] OR |
|-------------------------------------------------------------------------------------------------------------------------------------------------------------------------------------------------------------------------------------------------------------------------------------------------------------------------------------------------------------------------------------------------------------------------------------------------------------------------------------------------------------------------------------------------------------------------------------------------------------------------------------------------------------------------------------------------------------------------------------------------------------------------------------------------------------------------------------------------------------------------------------------------------------------------------------------------------------------------------------------------------------------------------------------------------------------------------------------------------------------------------------------------------------------------------------------------------------------------------------------------------------------------------------------------------------------------------------------------------------------------------------------------------------------------------------------------------------------------------------------------------------------------------------------------------------------------------------------------------------------------------------------------------------------------------------------------------------------------------------------------------------------------------------------------------------------------------------------------------------------------------------------------------------------------------------------------------------------------------------------------------------------------------------------------------------------------------------------------------------------------------------------------------------------------------------------------------------------------------------------------------------------------------------------------------------------------------------------------------------------------------------------------------------------------------------------------------------------------------------------------------------------------------------------------------------------------------------------------------------------------------------------------------------------------------------------------------------------------------------------------------------------------------------------------------------------------------------------------------------------------------------------------------------------------------------------------------------------------------------------------------------------------------------------------------------------------------------------------------------------------------------------------------------------------------------------------------------------------------------------------------------------------------------------------------------------------------------------------------------------------------------------------------------------------------------------------------------------------------------------------------------------------------------------------------------------------------|

|                                                                                                                                                                                                                                                                                                                                                                                                                                                                                                                                                                                                                                                                                                                                                                                                                                                                                                                                                                                                                                                                                                                                                                                                                                                                                                                                                                                                                                                                                                                                                                                                                                                                                                                                                                                                                                                                                                                                                                                                                                                                                                                                                                                                                                                                                                                                                                                                                                                                                                                                                                                                                                                                                                                                                                                                                                                                                                                                                                                                                                                                                                                                                                                                                                                                                                                                                                                                                                                                                                                                                                                                                 |
|-----------------------------------------------------------------------------------------------------------------------------------------------------------------------------------------------------------------------------------------------------------------------------------------------------------------------------------------------------------------------------------------------------------------------------------------------------------------------------------------------------------------------------------------------------------------------------------------------------------------------------------------------------------------------------------------------------------------------------------------------------------------------------------------------------------------------------------------------------------------------------------------------------------------------------------------------------------------------------------------------------------------------------------------------------------------------------------------------------------------------------------------------------------------------------------------------------------------------------------------------------------------------------------------------------------------------------------------------------------------------------------------------------------------------------------------------------------------------------------------------------------------------------------------------------------------------------------------------------------------------------------------------------------------------------------------------------------------------------------------------------------------------------------------------------------------------------------------------------------------------------------------------------------------------------------------------------------------------------------------------------------------------------------------------------------------------------------------------------------------------------------------------------------------------------------------------------------------------------------------------------------------------------------------------------------------------------------------------------------------------------------------------------------------------------------------------------------------------------------------------------------------------------------------------------------------------------------------------------------------------------------------------------------------------------------------------------------------------------------------------------------------------------------------------------------------------------------------------------------------------------------------------------------------------------------------------------------------------------------------------------------------------------------------------------------------------------------------------------------------------------------------------------------------------------------------------------------------------------------------------------------------------------------------------------------------------------------------------------------------------------------------------------------------------------------------------------------------------------------------------------------------------------------------------------------------------------------------------------------------|
| Moroccan[Title/Abstract] OR Mozambique[Title/Abstract] OR Mozambican[Title/Abstract] OR Myanmar[Title/Abstract] OR Burmese[Title/Abstract] OR Namibia[Title/Abstract] OR Namibian[Title/Abstract] OR Nauru[Title/Abstract] OR Nauruan[Title/Abstract] OR Nepal[Title/Abstract] OR Nepalese[Title/Abstract] OR Nicaragua[Title/Abstract] OR Nicaraguan[Title/Abstract] OR Niger[Title/Abstract] OR Nigerien[Title/Abstract] OR Nigeria[Title/Abstract] OR Nigerian[Title/Abstract] OR Macedonia[Title/Abstract] OR Macedonian[Title/Abstract] OR Northern Mariana Islands[Title/Abstract] OR Oman[Title/Abstract] OR Omani[Title/Abstract] OR Pakistan[Title/Abstract] OR Pakistani[Title/Abstract] OR Palau[Title/Abstract] OR Palauan[Title/Abstract] OR Panama[Title/Abstract] OR Panamanian[Title/Abstract] OR Papua New Guinea[Title/Abstract] OR Papua New Guinean[Title/Abstract] OR New Guinea[Title/Abstract] OR New Guinean[Title/Abstract] OR Paraguay[Title/Abstract] OR Paraguayan[Title/Abstract] OR Peru[Title/Abstract] OR Peruvian[Title/Abstract] OR Philippines[Title/Abstract] OR Filipino[Title/Abstract] OR Poland[Title/Abstract] OR Polish[Title/Abstract] OR Puerto Rico[Title/Abstract] OR Puerto Rican[Title/Abstract] OR Romania[Title/Abstract] OR Romanian[Title/Abstract] OR Russia[Title/Abstract] OR Russian[Title/Abstract] OR Rwanda[Title/Abstract] OR Rwandan[Title/Abstract] OR Samoa[Title/Abstract] OR Samoan[Title/Abstract] OR São Tomé and Príncipe[Title/Abstract] OR Sao Tomean[Title/Abstract] OR Saudi Arabia[Title/Abstract] OR Saudi[Title/Abstract] OR Senegal[Title/Abstract] OR Senegalese[Title/Abstract] OR Serbia[Title/Abstract] OR Serbian[Title/Abstract] OR Serbia and Montenegro[Title/Abstract] OR Montenegrin[Title/Abstract] OR Seychelles[Title/Abstract] OR Seychellois[Title/Abstract] OR Sierra Leone[Title/Abstract] OR Sierra Leonean[Title/Abstract] OR Slovakia[Title/Abstract] OR Slovak[Title/Abstract] OR Solomon Islands[Title/Abstract] OR Solomon Islander[Title/Abstract] OR Somalia[Title/Abstract] OR Somali[Title/Abstract] OR South Africa[Title/Abstract] OR South African[Title/Abstract] OR South Sudan[Title/Abstract] OR South Sudanese[Title/Abstract] OR Sri Lanka[Title/Abstract] OR Sri Lankan[Title/Abstract] OR Kitts and Nevis[Title/Abstract] OR Kittitian[Title/Abstract] OR Nevisian[Title/Abstract] OR St. Lucia[Title/Abstract] OR Saint Lucia[Title/Abstract] OR Vincent and the Grenadines[Title/Abstract] OR Vincentian[Title/Abstract] OR Sudan[Title/Abstract] OR Sudanese[Title/Abstract] OR Suriname[Title/Abstract] OR Surinamer[Title/Abstract] OR Syrian Arab Republic[Title/Abstract] OR Syrian[Title/Abstract] OR Tajikistan[Title/Abstract] OR Tajik[Title/Abstract] OR Tanzania[Title/Abstract] OR Tanzanian[Title/Abstract] OR Thailand[Title/Abstract] OR Thai[Title/Abstract] OR Timor-Leste[Title/Abstract] OR Timorese[Title/Abstract] OR Togo[Title/Abstract] OR Togolese[Title/Abstract] OR Tonga[Title/Abstract] OR Tongan[Title/Abstract] OR Trinidad[Title/Abstract] OR Tobago[Title/Abstract] OR Trinidadian[Title/Abstract] OR Tobagonian[Title/Abstract] OR Tunisia[Title/Abstract] OR Tunisian[Title/Abstract] OR Turkey[Title/Abstract] OR Turk[Title/Abstract] OR Turkmenistan[Title/Abstract] OR Turkmen[Title/Abstract] OR Tuvalu[Title/Abstract] OR Tuvaluan[Title/Abstract] OR Uganda[Title/Abstract] OR Ugandan[Title/Abstract] OR Ukraine[Title/Abstract] OR Ukrainian[Title/Abstract] OR Uruguay[Title/Abstract] OR Uruguayan[Title/Abstract] OR USSR[Title/Abstract] OR |
|-----------------------------------------------------------------------------------------------------------------------------------------------------------------------------------------------------------------------------------------------------------------------------------------------------------------------------------------------------------------------------------------------------------------------------------------------------------------------------------------------------------------------------------------------------------------------------------------------------------------------------------------------------------------------------------------------------------------------------------------------------------------------------------------------------------------------------------------------------------------------------------------------------------------------------------------------------------------------------------------------------------------------------------------------------------------------------------------------------------------------------------------------------------------------------------------------------------------------------------------------------------------------------------------------------------------------------------------------------------------------------------------------------------------------------------------------------------------------------------------------------------------------------------------------------------------------------------------------------------------------------------------------------------------------------------------------------------------------------------------------------------------------------------------------------------------------------------------------------------------------------------------------------------------------------------------------------------------------------------------------------------------------------------------------------------------------------------------------------------------------------------------------------------------------------------------------------------------------------------------------------------------------------------------------------------------------------------------------------------------------------------------------------------------------------------------------------------------------------------------------------------------------------------------------------------------------------------------------------------------------------------------------------------------------------------------------------------------------------------------------------------------------------------------------------------------------------------------------------------------------------------------------------------------------------------------------------------------------------------------------------------------------------------------------------------------------------------------------------------------------------------------------------------------------------------------------------------------------------------------------------------------------------------------------------------------------------------------------------------------------------------------------------------------------------------------------------------------------------------------------------------------------------------------------------------------------------------------------------------------|

|               |                                                                                                                                                                                                                                                                                                                                                                                                                                                                                                                                                                                                                                                                                                                                                                                                                                                                                                                                                                                                                                                                                                                                                                                                                                                                                                                                                                                                                                                                                                                                                                                                                                                                                                                                                                                                                                                                                                                                                                                                                                                                                                                                                                                                                                                                                                                                                                                                                                                                                                                                                                                                                                                                                                                                                                                                                                                                                                                                                                                                                                                                                                                                                                                                                                                                                                                                            |
|---------------|--------------------------------------------------------------------------------------------------------------------------------------------------------------------------------------------------------------------------------------------------------------------------------------------------------------------------------------------------------------------------------------------------------------------------------------------------------------------------------------------------------------------------------------------------------------------------------------------------------------------------------------------------------------------------------------------------------------------------------------------------------------------------------------------------------------------------------------------------------------------------------------------------------------------------------------------------------------------------------------------------------------------------------------------------------------------------------------------------------------------------------------------------------------------------------------------------------------------------------------------------------------------------------------------------------------------------------------------------------------------------------------------------------------------------------------------------------------------------------------------------------------------------------------------------------------------------------------------------------------------------------------------------------------------------------------------------------------------------------------------------------------------------------------------------------------------------------------------------------------------------------------------------------------------------------------------------------------------------------------------------------------------------------------------------------------------------------------------------------------------------------------------------------------------------------------------------------------------------------------------------------------------------------------------------------------------------------------------------------------------------------------------------------------------------------------------------------------------------------------------------------------------------------------------------------------------------------------------------------------------------------------------------------------------------------------------------------------------------------------------------------------------------------------------------------------------------------------------------------------------------------------------------------------------------------------------------------------------------------------------------------------------------------------------------------------------------------------------------------------------------------------------------------------------------------------------------------------------------------------------------------------------------------------------------------------------------------------------|
|               | Uzbekistan[Title/Abstract] OR Uzbek[Title/Abstract] OR Uzbekistani[Title/Abstract] OR Vanuatu[Title/Abstract] OR Ni-Vanuatu[Title/Abstract] OR Venezuela[Title/Abstract] OR Venezuelan[Title/Abstract] OR Vietnam[Title/Abstract] OR Vietnamese[Title/Abstract] OR West Bank[Title/Abstract] OR Gaza[Title/Abstract] OR Yemen[Title/Abstract] OR Yemeni[Title/Abstract] OR Yemenite[Title/Abstract] OR Yugoslavia[Title/Abstract] OR Yugoslav[Title/Abstract] OR Zambia[Title/Abstract] OR Zambian[Title/Abstract] OR Zimbabwe[Title/Abstract] OR Zimbabwean[Title/Abstract]                                                                                                                                                                                                                                                                                                                                                                                                                                                                                                                                                                                                                                                                                                                                                                                                                                                                                                                                                                                                                                                                                                                                                                                                                                                                                                                                                                                                                                                                                                                                                                                                                                                                                                                                                                                                                                                                                                                                                                                                                                                                                                                                                                                                                                                                                                                                                                                                                                                                                                                                                                                                                                                                                                                                                               |
| Cash transfer | social assistance[Title/Abstract] OR social policy[Title/Abstract] OR social policies[Title/Abstract] OR social welfare[Title/Abstract] OR social protection[Title/Abstract] OR poverty alleviation[Title/Abstract] OR poverty reduction[Title/Abstract] OR family policy[Title/Abstract] OR family policies[Title/Abstract] OR family welfare[Title/Abstract] OR public assistance[Title/Abstract] OR public policy[Title/Abstract] OR public policies[Title/Abstract] OR cash transfer[Title/Abstract] OR cash transfers[Title/Abstract] OR conditional[Title/Abstract] OR unconditional[Title/Abstract] OR maternal welfare[Title/Abstract] OR financial support[Title/Abstract] OR experimental social security[Title/Abstract] OR poverty reduction scheme[Title/Abstract] OR financial transfer[Title/Abstract] OR payment transfer[Title/Abstract] OR payment transfers[Title/Abstract] OR monetary transfer[Title/Abstract] OR monetary transfers[Title/Abstract] OR money transfer[Title/Abstract] OR money transfers[Title/Abstract] OR financial measure[Title/Abstract] OR financial measures[Title/Abstract] OR cash measure[Title/Abstract] OR cash measures[Title/Abstract] OR payment measure[Title/Abstract] OR payment measures[Title/Abstract] OR monetary measure[Title/Abstract] OR monetary measures[Title/Abstract] OR money measure[Title/Abstract] OR money measures[Title/Abstract] OR financial incentive[Title/Abstract] OR financial incentive[Title/Abstract] OR cash incentive[Title/Abstract] OR cash incentives[Title/Abstract] OR payment incentive[Title/Abstract] OR payment incentives[Title/Abstract] OR monetary incentive[Title/Abstract] OR monetary incentives[Title/Abstract] OR money incentive[Title/Abstract] OR money incentives[Title/Abstract] OR financial allowance[Title/Abstract] OR financial allowances[Title/Abstract] OR cash allowance[Title/Abstract] OR cash allowances[Title/Abstract] OR payment allowance[Title/Abstract] OR payment allowances[Title/Abstract] OR monetary allowance[Title/Abstract] OR monetary allowances[Title/Abstract] OR money allowance[Title/Abstract] OR money allowance[Title/Abstract] OR financial exclusion[Title/Abstract] OR financial exclusion[Title/Abstract] OR cash exclusion[Title/Abstract] OR cash exclusions[Title/Abstract] OR payment exclusion[Title/Abstract] OR payment exclusions[Title/Abstract] OR monetary exclusion[Title/Abstract] OR monetary exclusions[Title/Abstract] OR money exclusion[Title/Abstract] OR money exclusions[Title/Abstract] OR financial reform[Title/Abstract] OR financial reforms[Title/Abstract] OR cash reform[Title/Abstract] OR cash reforms[Title/Abstract] OR payment reform[Title/Abstract] OR payment reforms[Title/Abstract] OR monetary reform[Title/Abstract] OR monetary reforms[Title/Abstract] OR money reform[Title/Abstract] OR money reforms[Title/Abstract] OR financial gain[Title/Abstract] OR financial gains[Title/Abstract] OR cash gain[Title/Abstract] OR cash gains[Title/Abstract] OR payment gain[Title/Abstract] OR payment gains[Title/Abstract] OR monetary gain[Title/Abstract] OR monetary gains[Title/Abstract] OR money gain[Title/Abstract] OR money gains[Title/Abstract] OR financial credit[Title/Abstract] OR financial credits[Title/Abstract] OR cash |



|                   |                                                                                                                                                                                                                                                                                                                                                                                                                                                                                                                                                                                                                                                                                                                                                                                                                                                                                                                                                                                                                                                                                                                                                                                                                                                                                                                                                                                                                                                                                                                                                                                                                                                                                                                                                                                          |
|-------------------|------------------------------------------------------------------------------------------------------------------------------------------------------------------------------------------------------------------------------------------------------------------------------------------------------------------------------------------------------------------------------------------------------------------------------------------------------------------------------------------------------------------------------------------------------------------------------------------------------------------------------------------------------------------------------------------------------------------------------------------------------------------------------------------------------------------------------------------------------------------------------------------------------------------------------------------------------------------------------------------------------------------------------------------------------------------------------------------------------------------------------------------------------------------------------------------------------------------------------------------------------------------------------------------------------------------------------------------------------------------------------------------------------------------------------------------------------------------------------------------------------------------------------------------------------------------------------------------------------------------------------------------------------------------------------------------------------------------------------------------------------------------------------------------|
|                   | credit[Title/Abstract] OR cash credits[Title/Abstract] OR payment credit[Title/Abstract] OR payment credits[Title/Abstract] OR money credit[Title/Abstract] OR money credits[Title/Abstract] OR monetary credit[Title/Abstract] OR monetary credits[Title/Abstract] OR financial benefit[Title/Abstract] OR financial benefits[Title/Abstract] OR cash benefit[Title/Abstract] OR cash benefits[Title/Abstract] OR payment benefit[Title/Abstract] OR payment benefits[Title/Abstract] OR monetary benefit[Title/Abstract] OR monetary benefits[Title/Abstract] OR money benefit[Title/Abstract] OR money benefits[Title/Abstract]                                                                                                                                                                                                                                                                                                                                                                                                                                                                                                                                                                                                                                                                                                                                                                                                                                                                                                                                                                                                                                                                                                                                                       |
| Mental health     | mental health[Title/Abstract] OR mental disorders[Title/Abstract] OR mental disorder*[Title/Abstract] OR mental illness[Title/Abstract] OR mental illnesses[Title/Abstract] OR mental problem[Title/Abstract] OR mental problems[Title/Abstract] OR behaviour disorder[Title/Abstract] OR behaviour disorders[Title/Abstract] OR behavior disorder[Title/Abstract] OR behavior disorders[Title/Abstract] OR psychiatric mental disorder[Title/Abstract] OR psychiatric mental disorders[Title/Abstract] OR psychiatric diagnosis[Title/Abstract] OR psychiatric diagnoses[Title/Abstract] OR depression[Title/Abstract] OR anxiety[Title/Abstract] OR personality disorder[Title/Abstract] OR personality disorders[Title/Abstract] OR bipolar[Title/Abstract] OR schizophrenia[Title/Abstract] OR mood disorder[Title/Abstract] OR mood disorders[Title/Abstract] OR eating disorder[Title/Abstract] OR eating disorders[Title/Abstract] OR suicide[Title/Abstract] OR alcoholism[Title/Abstract] OR drinking behaviour[Title/Abstract] OR drinking behaviours[Title/Abstract] OR drinking behavior[Title/Abstract] OR drinking behaviors[Title/Abstract] OR drug taking[Title/Abstract] OR addiction[Title/Abstract] OR addictive behaviour[Title/Abstract] OR addictive behaviours[Title/Abstract] OR addictive behavior[Title/Abstract] OR addictive behaviors [Title/Abstract] OR positive mental health[Title/Abstract] OR wellbeing[Title/Abstract] OR well-being[Title/Abstract] OR self-esteem[Title/Abstract] OR self esteem[Title/Abstract] OR confidence[Title/Abstract]                                                                                                                                                                                                     |
| Controlled design | randomised[Title/Abstract] OR randomized[Title/Abstract] OR randomisation[Title/Abstract] OR randomization[Title/Abstract] OR longitudinal[Title/Abstract] OR placebo[Title/Abstract] OR single blind[Title/Abstract] OR double blind[Title/Abstract] OR triple blind[Title/Abstract] OR treble blind[Title/Abstract] OR single-blind[Title/Abstract] OR double-blind[Title/Abstract] OR controlled before[Title/Abstract] OR before and after[Title/Abstract] OR randomised controlled trial[Title/Abstract] OR randomized controlled trial[Title/Abstract] OR RCT[Title/Abstract] OR RCTs[Title/Abstract] OR repeated measure[Title/Abstract] OR repeated measures[Title/Abstract] OR trial[Title/Abstract] OR follow-up assessment[Title/Abstract] OR follow up assessment[Title/Abstract] OR follow-up assessments[Title/Abstract] OR follow up assessments[Title/Abstract] OR follow-up study[Title/Abstract] OR follow up study[Title/Abstract] OR follow-up studies[Title/Abstract] OR follow up studies[Title/Abstract] OR secondary analyses[Title/Abstract] OR secondary analysis[Title/Abstract] OR intervention study[Title/Abstract] OR intervention studies[Title/Abstract] OR intervention effect[Title/Abstract] OR intervention effects[Title/Abstract] OR treatment evaluation[Title/Abstract] OR treatment evaluations[Title/Abstract] OR treatment outcome[Title/Abstract] OR treatment outcomes[Title/Abstract] OR evaluation study[Title/Abstract] OR evaluation studies[Title/Abstract] OR cohort study[Title/Abstract] OR cohort studies[Title/Abstract] OR comparative group[Title/Abstract] OR comparative groups[Title/Abstract] OR comparison group[Title/Abstract] OR comparison groups[Title/Abstract] OR comparative study[Title/Abstract] OR comparative |

|  |                                                                                                                                                                      |
|--|----------------------------------------------------------------------------------------------------------------------------------------------------------------------|
|  | studies[Title/Abstract] OR comparison study[Title/Abstract] OR comparison studies[Title/Abstract] OR control group[Title/Abstract] OR control groups[Title/Abstract] |
|--|----------------------------------------------------------------------------------------------------------------------------------------------------------------------|

**MeSH terms**

| Concept | MeSH term                                                                                                                                                                                                                                                                                                                                                                                                                                                                                                                                                                                                                                                                                                                                                                                                                                                                                                                                                                                                                                                                                                                                                                                                                                                                                                                                                                                                                                                                                                                                                                                                                                                                                                                                                                                                                                                                                                                                                                                                                                                                                                                                                                                                                                                                                                                                                                                                                                                                                                                                                                                                                                                                                                                                                                                                                                                                                                                                                                                                                                 |
|---------|-------------------------------------------------------------------------------------------------------------------------------------------------------------------------------------------------------------------------------------------------------------------------------------------------------------------------------------------------------------------------------------------------------------------------------------------------------------------------------------------------------------------------------------------------------------------------------------------------------------------------------------------------------------------------------------------------------------------------------------------------------------------------------------------------------------------------------------------------------------------------------------------------------------------------------------------------------------------------------------------------------------------------------------------------------------------------------------------------------------------------------------------------------------------------------------------------------------------------------------------------------------------------------------------------------------------------------------------------------------------------------------------------------------------------------------------------------------------------------------------------------------------------------------------------------------------------------------------------------------------------------------------------------------------------------------------------------------------------------------------------------------------------------------------------------------------------------------------------------------------------------------------------------------------------------------------------------------------------------------------------------------------------------------------------------------------------------------------------------------------------------------------------------------------------------------------------------------------------------------------------------------------------------------------------------------------------------------------------------------------------------------------------------------------------------------------------------------------------------------------------------------------------------------------------------------------------------------------------------------------------------------------------------------------------------------------------------------------------------------------------------------------------------------------------------------------------------------------------------------------------------------------------------------------------------------------------------------------------------------------------------------------------------------------|
| LMIC    | "developing countries"[MeSH Terms] OR "medically underserved area"[MeSH Terms] OR "poverty areas"[MeSH Terms] OR "poverty"[MeSH Terms] OR "americas"[MeSH Terms] OR "africa"[MeSH Terms] OR "asia"[MeSH Terms] OR "south america"[MeSH Terms] OR "latin america"[MeSH Terms] OR "central america"[MeSH Terms]<br>OR<br>"afghanistan"[MeSH Terms] OR "albania"[MeSH Terms] OR "algeria"[MeSH Terms] OR "american samoa"[MeSH Terms] OR "angola"[MeSH Terms] OR "antigua and barbuda"[MeSH Terms] AND "antigua and barbuda"[MeSH Terms] OR "argentina"[MeSH Terms] OR "armenia"[MeSH Terms] OR "azerbaijan"[MeSH Terms] OR "bahrain"[MeSH Terms] OR "bangladesh"[MeSH Terms] OR "barbados"[MeSH Terms] OR "republic of belarus"[MeSH Terms] OR "belize"[MeSH Terms] OR "benin"[MeSH Terms] OR "bhutan"[MeSH Terms] OR "bolivia"[MeSH Terms] OR "bosnia and herzegovina"[MeSH Terms] AND "bosnia and herzegovina"[MeSH Terms] OR "botswana"[MeSH Terms] OR "brazil"[MeSH Terms] OR "bulgaria"[MeSH Terms] OR "burkina faso"[MeSH Terms] OR "burundi"[MeSH Terms] OR "cabo verde"[MeSH Terms] OR "cambodia"[MeSH Terms] OR "cameroon"[MeSH Terms] OR "central african republic"[MeSH Terms] OR "chad"[MeSH Terms] OR "chile"[MeSH Terms] OR "china"[MeSH Terms] OR "colombia"[MeSH Terms] OR "comoros"[MeSH Terms] OR "congo"[MeSH Terms] OR "costa rica"[MeSH Terms] OR "cote d'ivoire"[MeSH Terms] OR "croatia"[MeSH Terms] OR "cuba"[MeSH Terms] OR "czech republic"[MeSH Terms] OR "djibouti"[MeSH Terms] OR "dominica"[MeSH Terms] OR "dominican republic"[MeSH Terms] OR "ecuador"[MeSH Terms] OR "egypt"[MeSH Terms] OR "el salvador"[MeSH Terms] OR "equatorial guinea"[MeSH Terms] OR "eritrea"[MeSH Terms] OR "estonia"[MeSH Terms] OR Eswatini[MeSH Terms] OR "ethiopia"[MeSH Terms] OR "fiji"[MeSH Terms] OR "gabon"[MeSH Terms] OR "gambia"[MeSH Terms] OR "gambia"[MeSH Terms] OR ("georgia"[MeSH Terms] OR "georgia (republic)"[MeSH Terms]) OR "ghana"[MeSH Terms] OR "grenada"[MeSH Terms] OR "guatemala"[MeSH Terms] OR "guinea"[MeSH Terms] OR "guinea-bissau"[MeSH Terms] OR "guyana"[MeSH Terms] OR "haiti"[MeSH Terms] OR "honduras"[MeSH Terms] OR "hungary"[MeSH Terms] OR "india"[MeSH Terms] OR "indonesia"[MeSH Terms] OR "iran"[MeSH Terms] OR "iraq"[MeSH Terms] OR "united kingdom"[MeSH Terms] OR "jamaica"[MeSH Terms] OR "jordan"[MeSH Terms] OR "kazakhstan"[MeSH Terms] OR "kenya"[MeSH Terms] OR "micronesia"[MeSH Terms] OR "korea"[MeSH Terms] OR "kosovo"[MeSH Terms] OR "kyrgyzstan"[MeSH Terms] OR "laos"[MeSH Terms] OR "latvia"[MeSH Terms] OR "lebanon"[MeSH Terms] OR "lesotho"[MeSH Terms] OR "liberia"[MeSH Terms] OR "libya"[MeSH Terms] OR "lithuania"[MeSH Terms] OR "madagascar"[MeSH Terms] OR "malawi"[MeSH Terms] OR "malaysia"[MeSH Terms] OR "indian ocean islands"[MeSH Terms] OR "mali"[MeSH Terms] OR "malta"[MeSH Terms] OR "micronesia"[MeSH Terms] OR "mauritania"[MeSH Terms] OR "mauritius"[MeSH Terms] OR "comoros"[MeSH Terms] OR "mexico"[MeSH Terms] OR "micronesia"[MeSH |

|                   |                                                                                                                                                                                                                                                                                                                                                                                                                                                                                                                                                                                                                                                                                                                                                                                                                                                                                                                                                                                                                                                                                                                                                                                                                                                                                                                                                                                                                                                                                                                                                                                                                                                                                                                                                                                                                                                                                                                                                                                                                                                                                                                                                                             |
|-------------------|-----------------------------------------------------------------------------------------------------------------------------------------------------------------------------------------------------------------------------------------------------------------------------------------------------------------------------------------------------------------------------------------------------------------------------------------------------------------------------------------------------------------------------------------------------------------------------------------------------------------------------------------------------------------------------------------------------------------------------------------------------------------------------------------------------------------------------------------------------------------------------------------------------------------------------------------------------------------------------------------------------------------------------------------------------------------------------------------------------------------------------------------------------------------------------------------------------------------------------------------------------------------------------------------------------------------------------------------------------------------------------------------------------------------------------------------------------------------------------------------------------------------------------------------------------------------------------------------------------------------------------------------------------------------------------------------------------------------------------------------------------------------------------------------------------------------------------------------------------------------------------------------------------------------------------------------------------------------------------------------------------------------------------------------------------------------------------------------------------------------------------------------------------------------------------|
|                   | Terms] OR "moldova"[MeSH Terms] OR "micronesia"[MeSH Terms] OR "mongolia"[MeSH Terms] OR "montenegro"[MeSH Terms] OR "morocco"[MeSH Terms] OR "mozambique"[MeSH Terms] OR "myanmar"[MeSH Terms] OR "namibia"[MeSH Terms] OR "micronesia"[MeSH Terms] OR "nepal"[MeSH Terms] OR "nicaragua"[MeSH Terms] OR "niger"[MeSH Terms] OR "nigeria"[MeSH Terms] OR North Macedonia[MeSH Terms] OR "micronesia"[MeSH Terms] OR "oman"[MeSH Terms] OR "pakistan"[MeSH Terms] OR "palau"[MeSH Terms] OR "panama"[MeSH Terms] OR "papua new guinea"[MeSH Terms] OR "paraguay"[MeSH Terms] OR "peru"[MeSH Terms] OR "philippines"[MeSH Terms] OR "poland"[MeSH Terms] OR "puerto rico"[MeSH Terms] OR "romania"[MeSH Terms] OR "russia"[MeSH Terms] OR "russia"[MeSH Terms] OR "rwanda"[MeSH Terms] OR "samoa"[MeSH Terms] OR "saudi arabia"[MeSH Terms] OR "senegal"[MeSH Terms] OR "serbia"[MeSH Terms] OR "serbia"[MeSH Terms] AND "montenegro"[MeSH Terms] OR "seychelles"[MeSH Terms] OR "sierra leone"[MeSH Terms] OR "slovakia"[MeSH Terms] OR "slovakia"[MeSH Terms] OR "melanesia"[MeSH Terms] OR "somalia"[MeSH Terms] OR "south africa"[MeSH Terms] OR "south sudan"[MeSH Terms] OR "sri lanka"[MeSH Terms] AND "saint kitts and nevis"[MeSH Terms] OR "saint lucia"[MeSH Terms] AND "saint vincent and the grenadines"[MeSH Terms] OR "sudan"[MeSH Terms] OR "suriname"[MeSH Terms] OR "syria"[MeSH Terms] OR "syria"[MeSH Terms] OR "tajikistan"[MeSH Terms] OR "tanzania"[MeSH Terms] OR "thailand"[MeSH Terms] OR "indonesia"[MeSH Terms] OR "togo"[MeSH Terms] OR "tonga"[MeSH Terms] OR "trinidad and tobago"[MeSH Terms] AND "trinidad and tobago"[MeSH Terms] OR "trinidad and tobago"[MeSH Terms] OR "trinidad and tobago"[MeSH Terms] OR "tunisia"[MeSH Terms] OR "turkey"[MeSH Terms] OR "turkmenistan"[MeSH Terms] OR "micronesia"[MeSH Terms] OR "uganda"[MeSH Terms] OR "ukraine"[MeSH Terms] OR "uruguay"[MeSH Terms] OR "ussr"[MeSH Terms] OR "uzbekistan"[MeSH Terms] OR "vanuatu"[MeSH Terms] OR "venezuela"[MeSH Terms] OR "vietnam"[MeSH Terms] OR "middle east"[MeSH Terms] OR "yugoslavia"[MeSH Terms] OR "zambia"[MeSH Terms] OR "zimbabwe"[MeSH Terms] |
| Cash transfer     | "social welfare"[MeSH Terms] OR "public assistance"[MeSH Terms] OR "public policy"[MeSH Terms] OR "social security"[MeSH Terms] OR ("economics"[Subheading] OR ("government"[MeSH Terms] OR government[Text Word])) AND (("medical subject headings"[MeSH Terms] OR MeSH[Text Word]) AND Terms[All Fields]) OR "financial support"[MeSH Terms] OR "maternal welfare"[MeSH Terms] OR "motivation"[MeSH Terms] OR "relief work"[MeSH Terms] OR "relief work"[MeSH Terms]                                                                                                                                                                                                                                                                                                                                                                                                                                                                                                                                                                                                                                                                                                                                                                                                                                                                                                                                                                                                                                                                                                                                                                                                                                                                                                                                                                                                                                                                                                                                                                                                                                                                                                      |
| Mental health     | "mental disorders"[MeSH Terms] OR "mental health"[MeSH Terms] OR "behavioral symptoms"[MeSH Terms] OR "child behavior"[MeSH Terms] OR "drinking behavior"[MeSH Terms] OR "drug-seeking behavior"[MeSH Terms] OR "alcoholism"[MeSH Terms] OR "behavior"[MeSH Terms] OR "substance-related disorders"[MeSH Terms] AND "feeding and eating disorders"[MeSH Terms] OR "schizophrenia"[MeSH Terms] OR "personality disorders"[MeSH Terms] OR "depressive disorder"[MeSH Terms] OR "psychiatry"[MeSH Terms] OR "wellbeing"[MeSH Terms]                                                                                                                                                                                                                                                                                                                                                                                                                                                                                                                                                                                                                                                                                                                                                                                                                                                                                                                                                                                                                                                                                                                                                                                                                                                                                                                                                                                                                                                                                                                                                                                                                                            |
| Controlled design | "random allocation"[MeSH Terms] OR controlled clinical trial[MeSH Terms] OR "cohort studies"[MeSH Terms] OR "randomized controlled trials as topic"[MeSH Terms] OR "non-randomized controlled trials as topic"[MeSH Terms] OR "longitudinal studies"[MeSH Terms] OR "clinical trials as topic"[MeSH Terms] OR "control groups"[MeSH Terms] OR "double-blind                                                                                                                                                                                                                                                                                                                                                                                                                                                                                                                                                                                                                                                                                                                                                                                                                                                                                                                                                                                                                                                                                                                                                                                                                                                                                                                                                                                                                                                                                                                                                                                                                                                                                                                                                                                                                 |



|  |                                                                                                                                                                                                                                            |
|--|--------------------------------------------------------------------------------------------------------------------------------------------------------------------------------------------------------------------------------------------|
|  | method"[MeSH Terms] OR "single-blind method"[MeSH Terms] OR comparative study[MeSH Terms] OR evaluation studies[MeSH Terms] OR "placebos"[MeSH Terms] OR "controlled before-after studies"[MeSH Terms] OR "program evaluation"[MeSH Terms] |
|--|--------------------------------------------------------------------------------------------------------------------------------------------------------------------------------------------------------------------------------------------|

**All databases to be included:**

Medline, PsycInfo, PubMed Cochrane Central, Econlit, Social Science Research Network, ISI Web of Science, Social Sciences Citation Index (within Web of Science), Scielo, AfricaWide and CINAHL

**Search Strategy Medline and PubMed Cochrane Central - same as PubMed****Search Strategy PsycINFO, CINAHL, Africa Wide Information, Econlit, Medline (EBSCOhost) from 2000 to present**

| Concept | Keywords                                                                                                                                                                                                                                                                                                                                                                                                                                                                                                                                                                                                                                                                                                                                                                                                                                                                                                                                                                                                                                                                                                                                                                                                                                                                                                                                                                                                                                                                                                                                                                                                                                                                                                                                                                                                                                                                                                                                                                                                                                                                                                                                                                                                                                                                                                                                                                                                                                                                                                                                                                                                                                                                                                           |
|---------|--------------------------------------------------------------------------------------------------------------------------------------------------------------------------------------------------------------------------------------------------------------------------------------------------------------------------------------------------------------------------------------------------------------------------------------------------------------------------------------------------------------------------------------------------------------------------------------------------------------------------------------------------------------------------------------------------------------------------------------------------------------------------------------------------------------------------------------------------------------------------------------------------------------------------------------------------------------------------------------------------------------------------------------------------------------------------------------------------------------------------------------------------------------------------------------------------------------------------------------------------------------------------------------------------------------------------------------------------------------------------------------------------------------------------------------------------------------------------------------------------------------------------------------------------------------------------------------------------------------------------------------------------------------------------------------------------------------------------------------------------------------------------------------------------------------------------------------------------------------------------------------------------------------------------------------------------------------------------------------------------------------------------------------------------------------------------------------------------------------------------------------------------------------------------------------------------------------------------------------------------------------------------------------------------------------------------------------------------------------------------------------------------------------------------------------------------------------------------------------------------------------------------------------------------------------------------------------------------------------------------------------------------------------------------------------------------------------------|
| LMIC    | TI ((developing OR "less* developed" OR "third world" OR "under developed" OR "middle income" OR "low income" OR middle-income OR low-income OR underserved OR "under served" OR deprived OR poor*) N1 (count* OR nation* OR state* OR population) OR LMIC* OR poor OR deprived OR "South America*" OR "Latin America*" OR "Central America*" OR Africa OR Asia) OR AB((developing OR "less* developed" OR "third world" OR "under developed" OR "middle income" OR "low income" OR middle-income OR low-income OR underserved OR "under served" OR deprived OR poor*) N1 (count* OR nation OR nations OR state OR states OR population) OR LMIC* OR poor OR deprived OR "South America*" OR "Latin America*" OR "Central America*" OR Africa* OR Asia*) OR TI(Afghan* OR Albania* OR Algeria* OR "American Samoa*" OR Angola* OR "Antigua and Barbuda*" OR Argentin* OR Armenia* OR Azerbaijan* OR Bahrain* OR Bangladesh* OR Barbados* OR Belarus* OR Belize* OR Benin* OR Bhutan* OR Bolivia* OR Bosnia OR Herzegovin* OR "Bosnia and Herzegovina*" OR Botswana OR Batswana OR Brazil* OR Bulgaria* OR "Burkina*" OR Burma* OR Burundi* OR "Cape Verde*" OR "Cabo Verde*" OR Cambodia* OR Cameroon* OR "Central African Republic" OR "Central African*" OR Chad* OR Chile* OR Chin* OR Colombia* OR Comor* OR Congo* OR "Costa Rica*" OR "Côte d'Ivo*" OR "Cote d'Ivo*" OR Ivorian* OR Croatia* OR Cuba* OR "Czech" OR Djibouti* OR Dominica* OR Ecuador* OR Egypt* OR "Arab Rep*" OR "El Salvador*" OR "Equatorial Guinea*" OR Eritrea* OR Estonia* OR eSwatini OR IiSwati OR Ethiopia* OR Fiji* OR Gabon* OR The Gambia* OR Gambia* OR Georgia* OR Ghana* OR Grenad* OR Guatemala* OR Guinea* OR "Guinea-Bissau*" OR "Guinea Bissau*" OR Guyan* OR Haiti* OR Hondur* OR Hungar* OR India* OR Indonesia* OR Iran* OR "Islamic Rep*" OR Iraq* OR "Isle of Man*" OR Jamaica* OR Jordan* OR Kazakhstan* OR Kenya* OR Kiribati* OR Korea* OR Kosov* OR Kyrgyz* OR Lao* OR Latvia* OR Leban* OR Lesotho* OR Liberia* OR Libya* OR Lithuania* OR Madagascar* OR Malawi* OR Malaysia* OR Maldiv* OR Mali* OR Malt* OR "Marshall Island" OR Marshallese* OR Mauritania* OR Mauriti* OR Mayotte* OR Mexic* OR Micronesia* OR Moldova* OR Mongolia* OR Montenegr* OR Morocc* OR Mozambi* OR Myanmar* OR Namibia* OR Nauru* OR Nepal* OR Nicaragua* OR Niger* OR Nigeria* OR Macedonia* OR "Mariana Island*" OR Oman* OR Pakistan* OR Palau* OR Panama* OR "Papua New Guinea*" OR "New Guinea*" OR Paraguay* OR Peru* OR Philippin* OR Poland* OR Polish OR "Puerto Ric*" OR Romania* OR Russia* OR Rwanda* OR Samoa* OR "São Tomé and Príncipe*" OR "Sao Tome*" OR "Saudi Arabia*" OR Senegal* OR Serbia* OR "Serbia and |

|               |                                                                                                                                                                                                                                                                                                                                                                                                                                                                                                                                                                                                                                                                                                                                                                                                                                                                                                                                                                                                                                                                                                                                                                                                                                                                                                                                                                                                                                                                                                                                                                                                                                                                                                                                                                                                                                                                                                                                                                                                                                                                                                                                                                                                                                                                                                                                                                                                                                                                                                                                                                                                                                                                                                                                                                                                                                                                                                                                                                                                                                                                                                                                                                                                                                                                                  |
|---------------|----------------------------------------------------------------------------------------------------------------------------------------------------------------------------------------------------------------------------------------------------------------------------------------------------------------------------------------------------------------------------------------------------------------------------------------------------------------------------------------------------------------------------------------------------------------------------------------------------------------------------------------------------------------------------------------------------------------------------------------------------------------------------------------------------------------------------------------------------------------------------------------------------------------------------------------------------------------------------------------------------------------------------------------------------------------------------------------------------------------------------------------------------------------------------------------------------------------------------------------------------------------------------------------------------------------------------------------------------------------------------------------------------------------------------------------------------------------------------------------------------------------------------------------------------------------------------------------------------------------------------------------------------------------------------------------------------------------------------------------------------------------------------------------------------------------------------------------------------------------------------------------------------------------------------------------------------------------------------------------------------------------------------------------------------------------------------------------------------------------------------------------------------------------------------------------------------------------------------------------------------------------------------------------------------------------------------------------------------------------------------------------------------------------------------------------------------------------------------------------------------------------------------------------------------------------------------------------------------------------------------------------------------------------------------------------------------------------------------------------------------------------------------------------------------------------------------------------------------------------------------------------------------------------------------------------------------------------------------------------------------------------------------------------------------------------------------------------------------------------------------------------------------------------------------------------------------------------------------------------------------------------------------------|
|               | <p>Montenegr* OR Seychell* OR "Sierra Leone*" OR "Slovak*" OR "Solomon Island*" OR Somali* OR "South Africa*" OR "South Sudan*" OR "Sri Lanka*" OR "Kitts and Nevis" OR Kittitian* OR Nevisian* OR "St. Lucia*" OR "Saint Lucia*" OR "Vincent and the Grenadines" OR Vincentian* OR Sudan* OR Suriname* OR "Syrian Arab Rep*" OR Tajik* OR Tanzania* OR Thai* OR Timor* OR Leste* OR Togo* OR Tonga* OR Trinidad* OR Tobago* OR Tunisia* OR Turk* OR Turkmen* OR Tuvalu* OR Uganda* OR Ukrain* OR Uruguay* OR USSR* OR Uzbek* OR Vanuatu OR Ni-Vanuatu OR Venezuela* OR Vietnam* OR "West Bank*" OR Gaza* OR "Yemen*" OR Yugoslav* OR Zambia* OR Zimbabwe*) OR AB(Afghan* OR Albania* OR Algeria* OR "American Samoa*" OR Angola* OR "Antigua and Barbuda*" OR Argentin* OR Armenia* OR Azerbaijan* OR Bahrain* OR Bangladesh* OR Barbados* OR Belarus* OR Belize* OR Benin* OR Bhutan* OR Bolivia* OR Bosnia OR Herzegovin* OR "Bosnia and Herzegovina*" OR Botswana OR Batswana OR Brazil* OR Bulgaria* OR "Burkina*" OR Burma* OR Burundi* OR "Cape Verde*" OR "Cabo Verde*" OR Cambodia* OR Cameroon* OR "Central African Republic" OR "Central African*" OR Chad* OR Chile* OR Chin* OR Colombia* OR Comor* OR Congo* OR "Costa Rica*" OR "Côte d'Ivo*" OR "Cote d'Ivo*" OR Ivorian* OR Croatia* OR Cuba* OR "Czech" OR Djibouti* OR Dominica* OR Ecuador* OR Egypt* OR "Arab Rep*" OR "El Salvador*" OR "Equatorial Guinea*" OR Eritrea* OR Estonia* OR eSwatini OR IiSwati OR Ethiopia* OR Fiji* OR Gabon* OR The Gambia* OR Gambia* OR Georgia* OR Ghana* OR Grenad* OR Guatemala* OR Guinea* OR "Guinea-Bissau*" OR "Guinea Bissau*" OR Guyan* OR Haiti* OR Hondur* OR Hungar* OR India* OR Indonesia* OR Iran* OR "Islamic Rep*" OR Iraq* OR "Isle of Man*" OR Jamaica* OR Jordan* OR Kazakhstan* OR Kenya* OR Kiribati* OR Korea* OR Kosov* OR Kyrgyz* OR Lao* OR Latvia* OR Leban* OR Lesotho* OR Liberia* OR Libya* OR Lithuania* OR Madagascar* OR Malawi* OR Malaysia* OR Maldiv* OR Mali* OR Malt* OR "Marshall Island" OR Marshallese* OR Mauritania* OR Mauriti* OR Mayotte* OR Mexic* OR Micronesia* OR Moldova* OR Mongolia* OR Montenegr* OR Morocc* OR Mozambi* OR Myanmar* OR Namibia* OR Nauru* OR Nepal* OR Nicaragua* OR Niger* OR Nigeria* OR Macedonia* OR "Mariana Island*" OR Oman* OR Pakistan* OR Palau* OR Panama* OR "Papua New Guinea*" OR "New Guinea*" OR Paraguay* OR Peru* OR Philippin* OR Poland* OR Polish OR "Puerto Ric*" OR Romania* OR Russia* OR Rwanda* OR Samoa* OR "São Tomé and Príncipe*" OR "Sao Tome*" OR "Saudi Arabia*" OR Senegal* OR Serbia* OR "Serbia and Montenegr*" OR Seychell* OR "Sierra Leone*" OR Slovak* OR "Solomon Island*" OR Somali* OR "South Africa*" OR "South Sudan*" OR "Sri Lanka*" OR "Kitts and Nevis" OR Kittitian* OR Nevisian* OR "St Lucia*" OR "Saint Lucia*" OR "Vincent and the Grenadines" OR Vincentian* OR Sudan* OR Suriname* OR "Syrian Arab Rep*" OR Tajik* OR Tanzania* OR Thai* OR Timor* OR Leste* OR Togo* OR Tonga* OR Trinidad* OR Tobago* OR Tunisia* OR Turk* OR Turkmen* OR Tuvalu* OR Uganda* OR Ukrain* OR Uruguay* OR USSR* OR Uzbek* OR Vanuatu OR Ni-Vanuatu OR Venezuela* OR Vietnam* OR "West Bank*" OR Gaza* OR "Yemen*" OR Yugoslav* OR Zambia* OR Zimbabwe*)</p> |
| Cash transfer | <p>TI(social N1 (assistance OR polic* OR welfare* OR protection) OR "poverty alleviation" OR "poverty reduction" OR (family N1 (polic* OR welfare)) OR (public N1 (assistance OR polic*)) OR "cash transfer" OR (conditional OR unconditional) N1 ("cash transfer") OR conditional OR unconditional OR "maternal welfare" OR "financial support" OR "experimental social security" OR "poverty reduction scheme" OR (financial OR cash OR pay* OR monetary OR money) N1(transfer* OR measure* OR incentive* OR allowance* OR</p>                                                                                                                                                                                                                                                                                                                                                                                                                                                                                                                                                                                                                                                                                                                                                                                                                                                                                                                                                                                                                                                                                                                                                                                                                                                                                                                                                                                                                                                                                                                                                                                                                                                                                                                                                                                                                                                                                                                                                                                                                                                                                                                                                                                                                                                                                                                                                                                                                                                                                                                                                                                                                                                                                                                                                 |

|                   |                                                                                                                                                                                                                                                                                                                                                                                                                                                                                                                                                                                                                                                                                                                                                                                                                                                                                                                                                                                                                                                                                                                                                                            |
|-------------------|----------------------------------------------------------------------------------------------------------------------------------------------------------------------------------------------------------------------------------------------------------------------------------------------------------------------------------------------------------------------------------------------------------------------------------------------------------------------------------------------------------------------------------------------------------------------------------------------------------------------------------------------------------------------------------------------------------------------------------------------------------------------------------------------------------------------------------------------------------------------------------------------------------------------------------------------------------------------------------------------------------------------------------------------------------------------------------------------------------------------------------------------------------------------------|
|                   | exclu* OR reform* OR gain* OR credit* OR benefit*) OR AB(social N1 (assistance OR polic* OR welfare* OR protection) OR "poverty alleviation" OR "poverty reduction" OR (family N1 (polic* OR welfare)) OR (public N1 (assistance OR polic*)) OR "cash transfer" OR (conditional OR unconditional) N1 ("cash transfer") OR conditional OR unconditional OR "maternal welfare" OR "financial support" OR "experimental social security" OR "poverty reduction scheme" OR (financial OR cash OR pay* OR monetary OR money) N1(transfer* OR measure* OR incentive* OR allowance* OR exclu* OR reform* OR gain* OR credit* OR benefit*))                                                                                                                                                                                                                                                                                                                                                                                                                                                                                                                                        |
| Mental health     | TI (mental N1 (health OR disorder* OR illness* OR problem*) OR "behaviour disorder*" OR "psychiatric mental disorder*" OR "psychiatric diagnos*" OR depression OR anxiety OR "personality disorder*" OR bipolar OR schizophrenia OR "mood disorder*" OR "eating disorder*" OR alcoholism OR "drinking behavi*" OR "drug taking" OR addiction OR "addictive behavi*" OR "positive mental health" OR wellbeing OR self-esteem OR "self esteem" OR confidence) OR AB (mental N1 (health OR disorder* OR illness* OR problem*) OR "behaviour disorder*" OR "psychiatric mental disorder*" OR "psychiatric diagnos*" OR depression OR anxiety OR "personality disorder*" OR bipolar OR schizophrenia OR "mood disorder*" OR suicide* OR "eating disorder*" OR alcoholism OR "drinking behavi*" OR "drug taking" OR addiction OR "addictive behavi*" OR "positive mental health" OR wellbeing OR well-being OR self-esteem OR "self esteem" OR confidence)                                                                                                                                                                                                                       |
| Controlled design | TI (random* OR placebo* OR (single OR double OR triple OR treble) N1 (blind*) OR single-blind* OR double-blind* OR "controlled before" OR "intervention* stud*" OR longitud* OR "before and after" OR "repeat* measure*" OR "randomized* control* trial*" OR "RCT*" OR trial OR "follow-up assessment*" OR "follow up assessment*" OR "follow-up stud*" OR "follow up stud*" OR "secondary analys*" OR randomiz* OR ((intervention* OR treatment*) N1 (evaluat* OR effect* OR outcome* OR stud*)) OR "evaluation* stud*" OR "cohort stud*" OR "compar* group*" OR "compar* stud*" OR "control group*") OR AB (random* OR placebo* OR (single OR double OR triple OR treble) N1 (blind*) OR single-blind* OR double-blind* OR "controlled before" OR "before and after" OR "repeat* measure*" OR "randomized* control* trial*" OR "RCT*" OR trial OR "follow-up assessment*" OR "follow up assessment*" OR "follow-up stud*" OR "follow up stud*" OR "secondary analys*" OR randomiz* OR ((intervention* OR treatment*) N1 (evaluat* OR effect* OR outcome* OR stud*)) OR "evaluation* stud*" OR "cohort stud*" OR "compar* group*" OR "compar* stud*" OR "control group*") |

### Search Strategy CINAHL (2000 to present) – index terms

| Concept | Keywords                                                                                                                                                                                                                                                                                                                                                                                                                                                                                                                                                                                                                                                                                                                                                 |
|---------|----------------------------------------------------------------------------------------------------------------------------------------------------------------------------------------------------------------------------------------------------------------------------------------------------------------------------------------------------------------------------------------------------------------------------------------------------------------------------------------------------------------------------------------------------------------------------------------------------------------------------------------------------------------------------------------------------------------------------------------------------------|
| LMIC    | (MH "Low and Middle Income Countries") OR (MH "Developed Countries") OR (MH "Developing Countries") OR (MH "Africa+") OR (MH "Asia+") OR (MH "Central America+") OR (MH "Latin America") OR (MH "South America+") OR (MH "Mexico") OR (MH "West Indies+") OR (MH "Albania") OR (MH "Bosnia-Herzegovina") OR (MH "Croatia") OR (MH "Czech Republic") OR (MH "Hungary") OR (MH "Macedonia (Republic)") OR (MH "Romania") OR (MH "Serbia") OR (MH "Slovakia") OR (MH "Arabia") OR (MH "Czechoslovakia") OR (MH "Korea") OR (MH "Afghanistan") OR (MH "Bahrain") OR (MH "Egypt") OR (MH "Iran") OR (MH "Iraq") OR (MH "Israel") OR (MH "Jordan") OR (MH "Lebanon") OR (MH "Libya") OR (MH "Oman") OR (MH "Saudi Arabia") OR (MH "Syria") OR (MH "Turkey") OR |

|                   |                                                                                                                                                                                                                                                                                                                              |
|-------------------|------------------------------------------------------------------------------------------------------------------------------------------------------------------------------------------------------------------------------------------------------------------------------------------------------------------------------|
|                   | (MH "United Arab Emirates") OR (MH "Yemen") OR (MH "New Guinea") OR (MH "USSR+") OR (MH "Indian Ocean Islands+") OR (MH "Micronesia+")                                                                                                                                                                                       |
| Cash transfer     | (MH "Social Welfare+") OR (MH "Public Assistance+") OR (MH "Public Policy+") OR (MH "Economic and Social Security") OR (MH "Insurance, Unemployment")                                                                                                                                                                        |
| Mental health     | (MH "Behavioral and Mental Disorders+") OR (MH "Child Behavior+") OR (MH "Coping+") OR (MH "Diagnosis, Psychosocial+") OR (MH "Drinking Behavior+") OR (MH "Personality+") OR (MH "Substance Abuse+") OR (MH "Adolescent Behavior") OR (MH "Disruptive Behavior") OR (MH "Mental Health") OR (MH "Psychological Well-Being") |
| Controlled design | (MH "Clinical Trials+") OR (MH "Community Trials") OR (MH "Controlled Before-After Studies") OR (MH "Nonrandomized Trials") OR (MH "Pretest-Posttest Design+") OR (MH "Double-Blind Studies") OR (MH "Single-Blind Studies") OR (MH "Triple-Blind Studies") OR (MH "Repeated Measures") OR (MH "Quasi-Experimental Studies") |

### Search Strategy PsycINFO & Africa Wide (2000 to present) – index terms

| Concept       | Keywords                                                                                                                                                                                                                                                                                                                                                                                                                                                                                                                                                                                                                                                                                                                                                                                                                                                                                                                                                                                                                                                                                                                                                                                                                                                                                                                                                                                                                                                                                                                                                                                                                                                                                                                                                                                                                                          |
|---------------|---------------------------------------------------------------------------------------------------------------------------------------------------------------------------------------------------------------------------------------------------------------------------------------------------------------------------------------------------------------------------------------------------------------------------------------------------------------------------------------------------------------------------------------------------------------------------------------------------------------------------------------------------------------------------------------------------------------------------------------------------------------------------------------------------------------------------------------------------------------------------------------------------------------------------------------------------------------------------------------------------------------------------------------------------------------------------------------------------------------------------------------------------------------------------------------------------------------------------------------------------------------------------------------------------------------------------------------------------------------------------------------------------------------------------------------------------------------------------------------------------------------------------------------------------------------------------------------------------------------------------------------------------------------------------------------------------------------------------------------------------------------------------------------------------------------------------------------------------|
| LMIC          | (DE "Middle Income Level" OR DE "Lower Income Level" OR DE "Developing Countries" OR DE "Disadvantaged")                                                                                                                                                                                                                                                                                                                                                                                                                                                                                                                                                                                                                                                                                                                                                                                                                                                                                                                                                                                                                                                                                                                                                                                                                                                                                                                                                                                                                                                                                                                                                                                                                                                                                                                                          |
| Cash transfer | (DE "Welfare Reform" OR DE "Community Welfare Services" OR DE "Social Support" OR DE "Economic Development" OR DE "Poverty" OR DE "Educational Financial Assistance" OR DE "Financial Services" OR DE "Economic Security" OR DE "Welfare Reform" OR DE "Economic Security" OR DE "Government Programs" OR DE "Social Security" OR DE "Upward Bound" OR DE "Welfare Services (Government)")                                                                                                                                                                                                                                                                                                                                                                                                                                                                                                                                                                                                                                                                                                                                                                                                                                                                                                                                                                                                                                                                                                                                                                                                                                                                                                                                                                                                                                                        |
| Mental health | (DE "Suicide" OR DE "Attempted Suicide" OR DE "Suicidality" OR DE "Affective Disorders" OR DE "Disruptive Mood Dysregulation Disorder" OR DE "Major Depression" OR DE "Seasonal Affective Disorder" OR DE "Anxiety Disorders" OR DE "Castration Anxiety" OR DE "Death Anxiety" OR DE "Generalized Anxiety Disorder" OR DE "Obsessive Compulsive Disorder" OR DE "Panic Attack" OR DE "Panic Disorder" OR DE "Phobias" OR DE "Separation Anxiety Disorder" OR DE "Trichotillomania" OR DE "Autism Spectrum Disorders" OR DE "Autistic Traits" OR DE "Bipolar Disorder" OR DE "Bipolar I Disorder" OR DE "Bipolar II Disorder" OR DE "Cyclothymic Disorder" OR DE "Mania" OR DE "Chronic Mental Illness" OR DE "Chronic Psychosis" OR DE "Dissociative Disorders" OR DE "Depersonalization" OR DE "Depersonalization/Derealization Disorder" OR DE "Dissociative Amnesia" OR DE "Dissociative Identity Disorder" OR DE "Fugue Reaction" OR DE "Eating Disorders" OR DE "Anorexia Nervosa" OR DE "Binge Eating Disorder" OR DE "Bulimia" OR DE "Feeding Disorders" OR DE "Hyperphagia" OR DE "Kleine Levin Syndrome" OR DE "Pica" OR DE "Purging (Eating Disorders)" OR DE "Rumination (Eating)" OR DE "Neurocognitive Disorders" OR DE "Consciousness Disorders" OR DE "Delirium" OR DE "Dementia" OR DE "Memory Disorders" OR DE "Neurodevelopmental Disorders" OR DE "Attention Deficit Disorder" OR DE "Autism Spectrum Disorders" OR DE "Developmental Disabilities" OR DE "Disruptive Behavior Disorders" OR DE "Emotional and Behavioral Disorders" OR DE "Intellectual Development Disorder" OR DE "Learning Disorders" OR DE "Learning Disabilities" OR DE "Reading Disabilities" OR DE "Personality Disorders" OR DE "Antisocial Personality Disorder" OR DE "Avoidant Personality Disorder" OR DE "Borderline Personality Disorder" OR DE |

|                   |                                                                                                                                                                                                                                                                                                                                                                                                                                                                                                                                                                                                                                                                                                                                                                                                                                                                                                                                                                                                                                                                                                                                                                                                                                                                                                                                                                                                                                                                                                                                                                                                                                                                                                                                                                                                                                                                                                                                                                                                                                                                                                                                                                                                                                                                                                                                                                                                                                                                                                                                                                                                                                                                                                                                                                    |
|-------------------|--------------------------------------------------------------------------------------------------------------------------------------------------------------------------------------------------------------------------------------------------------------------------------------------------------------------------------------------------------------------------------------------------------------------------------------------------------------------------------------------------------------------------------------------------------------------------------------------------------------------------------------------------------------------------------------------------------------------------------------------------------------------------------------------------------------------------------------------------------------------------------------------------------------------------------------------------------------------------------------------------------------------------------------------------------------------------------------------------------------------------------------------------------------------------------------------------------------------------------------------------------------------------------------------------------------------------------------------------------------------------------------------------------------------------------------------------------------------------------------------------------------------------------------------------------------------------------------------------------------------------------------------------------------------------------------------------------------------------------------------------------------------------------------------------------------------------------------------------------------------------------------------------------------------------------------------------------------------------------------------------------------------------------------------------------------------------------------------------------------------------------------------------------------------------------------------------------------------------------------------------------------------------------------------------------------------------------------------------------------------------------------------------------------------------------------------------------------------------------------------------------------------------------------------------------------------------------------------------------------------------------------------------------------------------------------------------------------------------------------------------------------------|
|                   | "Dependent Personality Disorder" OR DE "Histrionic Personality Disorder" OR DE "Narcissistic Personality Disorder" OR DE "Obsessive Compulsive Personality Disorder" OR DE "Paranoid Personality Disorder" OR DE "Passive Aggressive Personality Disorder" OR DE "Sadomasochistic Personality" OR DE "Schizoid Personality Disorder" OR DE "Schizotypal Personality Disorder" OR DE "Psychosis" OR DE "Acute Psychosis" OR DE "Affective Psychosis" OR DE "Alcoholic Psychosis" OR DE "Capgras Syndrome" OR DE "Childhood Psychosis" OR DE "Chronic Psychosis" OR DE "Experimental Psychosis" OR DE "Hallucinosi s" OR DE "Paranoia (Psychosis)" OR DE "Postpartum Psychosis" OR DE "Reactive Psychosis" OR DE "Schizophrenia" OR DE "Senile Psychosis" OR DE "Toxic Psychoses" OR DE "Somatoform Disorders" OR DE "Body Dysmorphic Disorder" OR DE "Conversion Disorder" OR DE "Factitious Disorders" OR DE "Hypochondriasis" OR DE "Hysteria" OR DE "Neurasthenia" OR DE "Neurodermatitis" OR DE "Somatization Disorder" OR DE "Somatoform Pain Disorder" OR DE "Stress and Trauma Related Disorders" OR DE "Acute Stress Disorder" OR DE "Adjustment Disorders" OR DE "Attachment Disorders" OR DE "Posttraumatic Stress Disorder" OR DE "Substance Related and Addictive Disorders" OR DE "Nonsubstance Related Addictions" OR DE "Substance Use Disorder" OR DE "Conduct Disorder" OR DE "Disruptive Behavior Disorders" OR DE "Conduct Disorder" OR DE "Oppositional Defiant Disorder" OR DE "Impulse Control Disorders" OR DE "Explosive Disorder" OR DE "Juvenile Delinquency" OR DE "Predelinquent Youth" OR DE "Female Delinquency" OR DE "Male Delinquency" OR DE "Aggressive Behavior" OR DE "Aggressive Driving Behavior" OR DE "Attack Behavior" OR DE "Coercion" OR DE "Conflict" OR DE "Microaggression" OR DE "Relational Aggression" OR DE "Threat" OR DE "Antisocial Behavior" OR DE "Child Neglect" OR DE "Corruption" OR DE "Criminal Behavior" OR DE "Cruelty" OR DE "Dangerousness" OR DE "Elder Abuse" OR DE "Emotional Abuse" OR DE "Harassment" OR DE "Juvenile Delinquency" OR DE "Patient Abuse" OR DE "Persecution" OR DE "Physical Abuse" OR DE "Prisoner Abuse" OR DE "Recidivism" OR DE "Runaway Behavior" OR DE "Sexual Abuse" OR DE "Terrorism" OR DE "Torture" OR DE "Verbal Abuse" OR DE "Violence" OR DE "Behavior Problems" OR DE "Tantrums" OR DE "Well Being" OR DE "Spiritual Well Being" OR DE "Mental Health" OR DE "Mental Status" OR DE "Cognitive Ability" OR DE "Cognitive Impairment" OR DE "Brain Training" OR DE "Mathematical Ability" OR DE "Reading Ability" OR DE "Spatial Ability" OR DE "Verbal Ability" OR DE "Executive Function" OR DE "Cognitive Control" OR DE "Set Shifting" OR DE "Task Switching") |
| Controlled design | (DE "Cohort Analysis" OR DE "Followup Studies" OR DE "Longitudinal Studies" OR DE "Prospective Studies" OR DE "Repeated Measures" OR DE "Randomized Controlled Trials" OR DE "Randomized Clinical Trials" OR DE "Placebo" OR DE "Random Sampling" OR DE "Treatment Effectiveness Evaluation")                                                                                                                                                                                                                                                                                                                                                                                                                                                                                                                                                                                                                                                                                                                                                                                                                                                                                                                                                                                                                                                                                                                                                                                                                                                                                                                                                                                                                                                                                                                                                                                                                                                                                                                                                                                                                                                                                                                                                                                                                                                                                                                                                                                                                                                                                                                                                                                                                                                                      |

### Search strategy ProQuest from 2000 to present

| Concept | Keywords                                                                                                                                                                                                                                                                                                                                                                                                                                |
|---------|-----------------------------------------------------------------------------------------------------------------------------------------------------------------------------------------------------------------------------------------------------------------------------------------------------------------------------------------------------------------------------------------------------------------------------------------|
| LMIC    | tiab((developing OR "less* developed" OR "third world" OR "under developed" OR "middle income" OR "low income" OR middle-income OR low-income OR underserved OR "under served" OR deprived OR poor*) NEAR/1 (countr* OR nation* OR state* OR population) OR LMIC* OR poor OR deprived OR "South America" OR "Latin America*" OR "Central America*" OR Africa OR Asia) OR ab((developing OR "less* developed" OR "third world" OR "under |



developed" OR "middle income" OR "low income" OR middle-income OR low-income OR underserved OR "under served" OR deprived OR poor\*) NEAR/1 (count\* OR nation OR nations OR state OR states OR population) OR LMIC\* OR poor OR deprived OR "South America\*" OR "Latin America\*" OR "Central America\*" OR Africa\* OR Asia\*) OR ti(Afghan\* OR Albania\* OR Algeria\* OR "American Samoa\*" OR Angola\* OR "Antigua and Barbuda\*" OR Argentin\* OR Armenia\* OR Azerbaijan\* OR Bahrain\* OR Bangladesh\* OR Barbados\* OR Belarus\* OR Belize\* OR Benin\* OR Bhutan\* OR Bolivia\* OR Bosnia OR Herzegovin\* OR "Bosnia and Herzegovina\*" OR Botswana OR Batswana OR Brazil\* OR Bulgaria\* OR "Burkina\*" OR Burma\* OR Burundi\* OR "Cape Verde\*" OR "Cabo Verde\*" OR Cambodia\* OR Cameroon\* OR "Central African Republic" OR "Central African\*" OR Chad\* OR Chile\* OR Chin\* OR Colombia\* OR Comor\* OR Congo\* OR "Costa Rica\*" OR "Côte d'Ivo\*" OR "Cote d'Ivo\*" OR Ivorian\* OR Croatia\* OR Cuba\* OR "Czech" OR Djibouti\* OR Dominica\* OR Ecuador\* OR Egypt\* OR "Arab Rep\*" OR "El Salvador\*" OR "Equatorial Guinea\*" OR Eritrea\* OR Estonia\* OR eSwatini OR liSwati OR Ethiopia\* OR Fiji\* OR Gabon\* OR The Gambia\* OR Gambia\* OR Georgia\* OR Ghana\* OR Grenad\* OR Guatemala\* OR Guinea\* OR "Guinea-Bissau\*" OR "Guinea Bissau\*" OR Guyan\* OR Haiti\* OR Hondur\* OR Hungar\* OR India\* OR Indonesia\* OR Iran\* OR "Islamic Rep\*" OR Iraq\* OR "Isle of Man\*" OR Jamaica\* OR Jordan\* OR Kazakhstan\* OR Kenya\* OR Kiribati\* OR Korea\* OR Kosov\* OR Kyrgyz\* OR Lao\* OR Latvia\* OR Leban\* OR Lesotho\* OR Liberia\* OR Libya\* OR Lithuania\* OR Madagascar\* OR Malawi\* OR Malaysia\* OR Maldiv\* OR Mali\* OR Malt\* OR "Marshall Island" OR Marshallese\* OR Mauritania\* OR Mauriti\* OR Mayotte\* OR Mexic\* OR Micronesia\* OR Moldova\* OR Mongolia\* OR Montenegr\* OR Morocc\* OR Mozambi\* OR Myanmar\* OR Namibia\* OR Nauru\* OR Nepal\* OR Nicaragua\* OR Niger\* OR Nigeria\* OR Macedonia\* "Mariana Island\*" OR Oman\* OR Pakistan\* OR Palau\* OR Panama\* OR "Papua New Guinea\*" OR "New Guinea\*" OR Paraguay\* OR Peru\* OR Philippin\* OR Poland\* OR Polish OR "Puerto Ric\*" OR Romania\* OR Russia\* OR Rwanda\* OR Samoa\* OR "São Tomé and Príncipe\*" OR "Sao Tome\*" OR "Saudi Arabia\*" OR Senegal\* OR Serbia\* OR "Serbia and Montenegr\*" OR Seychell\* OR "Sierra Leone\*" OR Slovak\* OR "Solomon Island\*" OR Somali\* OR "South Africa\*" OR "South Sudan\*" OR "Sri Lanka\*" OR "Kitts and Nevis" OR Kittitian\* OR Nevisian\* OR "St Lucia\*" OR "Saint Lucia\*" OR "Vincent and the Grenadines" OR Vincentian\* OR Sudan\* OR Suriname\* OR "Syrian Arab Rep\*" OR Tajik\* OR Tanzania\* OR Thai\* OR Timor\* OR Leste\* OR Togo\* OR Tonga\* OR Trinidad\* OR Tobago\* OR Tunisia\* OR Turk\* OR Turkmen\* OR Tuvalu\* OR Uganda\* OR Ukrain\* OR Uruguay\* OR USSR\* OR Uzbek\* OR Vanuatu OR Ni-Vanuatu OR Venezuela\* OR Vietnam\* OR "West Bank\*" OR Gaza\* OR "Yemen\*" OR Yugoslav\* OR Zambia\* OR Zimbabwe\*) OR AB(Afghan\* OR Albania\* OR Algeria\* OR "American Samoa\*" OR Angola\* OR "Antigua and Barbuda\*" OR Argentin\* OR Armenia\* OR Azerbaijan\* OR Bahrain\* OR Bangladesh\* OR Barbados\* OR Belarus\* OR Belize\* OR Benin\* OR Bhutan\* OR Bolivia\* OR Bosnia OR Herzegovin\* OR "Bosnia and Herzegovina\*" OR Botswana OR Batswana OR Brazil\* OR Bulgaria\* OR "Burkina\*" OR Burma\* OR Burundi\* OR "Cape Verde\*" OR "Cabo Verde\*" OR Cambodia\* OR Cameroon\* OR "Central African Republic" OR "Central African\*" OR Chad\* OR Chile\* OR Chin\* OR Colombia\* OR Comor\* OR Congo\* OR "Costa Rica\*" OR

|                   |                                                                                                                                                                                                                                                                                                                                                                                                                                                                                                                                                                                                                                                                                                                                                                                                                                                                                                                                                                                                                                                                                                                                                                                                                                                                                                                                                                                                                                                                                                                                                                                                                                                                                                                                                                                                                                                                                                                                                                                                                                   |
|-------------------|-----------------------------------------------------------------------------------------------------------------------------------------------------------------------------------------------------------------------------------------------------------------------------------------------------------------------------------------------------------------------------------------------------------------------------------------------------------------------------------------------------------------------------------------------------------------------------------------------------------------------------------------------------------------------------------------------------------------------------------------------------------------------------------------------------------------------------------------------------------------------------------------------------------------------------------------------------------------------------------------------------------------------------------------------------------------------------------------------------------------------------------------------------------------------------------------------------------------------------------------------------------------------------------------------------------------------------------------------------------------------------------------------------------------------------------------------------------------------------------------------------------------------------------------------------------------------------------------------------------------------------------------------------------------------------------------------------------------------------------------------------------------------------------------------------------------------------------------------------------------------------------------------------------------------------------------------------------------------------------------------------------------------------------|
|                   | <p>“Côte d'Ivo*” OR “Cote d'Ivo*” OR Ivorian* OR Croatia* OR Cuba* OR “Czech” OR Djibouti* OR Dominica* OR Ecuador* OR Egypt* OR “Arab Rep*” OR “El Salvador*” OR “Equatorial Guinea*” OR Eritrea* OR Estonia* OR eSwatini OR IiSwati OR Ethiopia* OR Fiji* OR Gabon* OR The Gambia* OR Gambia* OR Georgia* OR Ghana* OR Grenad* OR Guatemala* OR Guinea* OR “Guinea-Bissau*” OR “Guinea Bissau*” OR Guyan* OR Haiti* OR Hondur* OR Hungar* OR India* OR Indonesia* OR Iran* OR “Islamic Rep*” OR Iraq* OR “Isle of Man*” OR Jamaica* OR Jordan* OR Kazakhstan* OR Kenya* OR Kiribati* OR Korea* OR Kosov* OR Kyrgyz* OR Lao* OR Latvia* OR Leban* OR Lesotho* OR Liberia* OR Libya* OR Lithuania* OR Madagascar* OR Malawi* OR Malaysia* OR Maldiv* OR Mali* OR Malt* OR “Marshall Island” OR Marshallese* OR Mauritania* OR Mauriti* OR Mayotte* OR Mexic* OR Micronesia* OR Moldova* OR Mongolia* OR Montenegr* OR Morocc* OR Mozambi* OR Myanmar* OR Namibia* OR Nauru* OR Nepal* OR Nicaragua* OR Niger* OR Nigeria* OR Macedonia* “Mariana Island*” OR Oman* OR Pakistan* OR Palau* OR Panama* OR “Papua New Guinea*” OR “New Guinea*” OR Paraguay* OR Peru* OR Philippin* OR Poland* OR Polish OR “Puerto Ric*” OR Romania* OR Russia* OR Rwanda* OR Samoa* OR “São Tomé and Príncipe*” OR “Sao Tome*” OR “Saudi Arabia*” OR Senegal* OR Serbia* OR “Serbia and Montenegr*” OR Seychell* OR “Sierra Leone*” OR Slovak* OR “Solomon Island*” OR Somali* OR “South Africa*” OR “South Sudan*” OR “Sri Lanka*” OR “Kitts and Nevis” OR Kittitian* OR Nevisian* OR “St Lucia*” OR “Saint Lucia*” OR “Vincent and the Grenadines” OR Vincentian* OR Sudan* OR Suriname* OR “Syrian Arab Rep*” OR Tajik* OR Tanzania* OR Thai* OR Timor* OR Leste* OR Togo* OR Tonga* OR Trinidad* OR Tobago* OR Tunisia* OR Turk* OR Turkmen* OR Tuvalu* OR Uganda* OR Ukrain* OR Uruguay* OR USSR* OR Uzbek* OR Vanuatu OR Ni-Vanuatu OR Venezuela* OR Vietnam* OR “West Bank*” OR Gaza* OR “Yemen*” OR Yugoslav* OR Zambia* OR Zimbabwe*)</p> |
| Cash transfer     | <p>tiab(social NEAR/1 (assistance OR polic* OR welfare* OR protection) OR “poverty alleviation” OR “poverty reduction” OR (family NEAR/1 (polic* OR welfare)) OR (public NEAR/1 (assistance OR polic*)) OR “cash transfer” OR conditional OR unconditional OR “maternal welfare” OR “financial support” OR “experimental social security” OR “poverty reduction scheme” OR (financial OR cash OR pay* OR monetary OR money) NEAR/1(transfer* OR measure* OR incentive* OR allowance* OR exclu* OR reform* OR gain* OR credit* OR benefit*))</p>                                                                                                                                                                                                                                                                                                                                                                                                                                                                                                                                                                                                                                                                                                                                                                                                                                                                                                                                                                                                                                                                                                                                                                                                                                                                                                                                                                                                                                                                                   |
| Mental health     | <p>tiab(mental NEAR/1 (health OR disorder* OR illness* OR problem*) OR “behaviour disorder*” OR “psychiatric mental disorder*” OR “psychiatric diagnos*” OR depression OR anxiety OR “personality disorder*” OR bipolar OR schizophrenia OR “mood disorder*” OR suicid* OR “eating disorder*” OR alcoholism OR “drinking behavi*” OR “drug taking” OR addiction OR “addictive behavi*” OR “positive mental health” OR wellbeing OR well-being OR self-esteem OR “self esteem” OR confidence)</p>                                                                                                                                                                                                                                                                                                                                                                                                                                                                                                                                                                                                                                                                                                                                                                                                                                                                                                                                                                                                                                                                                                                                                                                                                                                                                                                                                                                                                                                                                                                                  |
| Controlled design | <p>tiab(random* OR placebo* OR (single OR double OR triple OR treble) NEAR/1 (blind*) OR single-blind* OR double-blind* OR longitud* OR “controlled before” OR “before and after” OR “repeat* measure*” OR “randomized* control* trial*” OR “RCT*” OR trial OR “follow-up assessment*” OR “follow up assessment*” OR “follow-up stud*” OR “follow up stud*” OR “secondary analys*” OR randomiz* OR</p>                                                                                                                                                                                                                                                                                                                                                                                                                                                                                                                                                                                                                                                                                                                                                                                                                                                                                                                                                                                                                                                                                                                                                                                                                                                                                                                                                                                                                                                                                                                                                                                                                            |

|  |                                                                                                                                                                                       |
|--|---------------------------------------------------------------------------------------------------------------------------------------------------------------------------------------|
|  | ((intervention* OR treatment) NEAR/1 (evaluat* OR effect* OR outcome* OR stud*)) OR "evaluation* stud*" OR "cohort stud*" OR "compar* group*" OR "compar* stud*" OR "control group*") |
|--|---------------------------------------------------------------------------------------------------------------------------------------------------------------------------------------|

**Social Sciences Citation Index (ISI Web of Science) from 2002 to present**

| Concept | Keywords                                                                                                                                                                                                                                                                                                                                                                                                                                                                                                                                                                                                                                                                                                                                                                                                                                                                                                                                                                                                                                                                                                                                                                                                                                                                                                                                                                                                                                                                                                                                                                                                                                                                                                                                                                                                                                                                                                                                                                                                                                                                                                                                                                                                                                                                                                                                                                                                                                                                                                                                                                                                                                                                                                                                                                                                                                                                                                                                                                                                                                                                                                             |
|---------|----------------------------------------------------------------------------------------------------------------------------------------------------------------------------------------------------------------------------------------------------------------------------------------------------------------------------------------------------------------------------------------------------------------------------------------------------------------------------------------------------------------------------------------------------------------------------------------------------------------------------------------------------------------------------------------------------------------------------------------------------------------------------------------------------------------------------------------------------------------------------------------------------------------------------------------------------------------------------------------------------------------------------------------------------------------------------------------------------------------------------------------------------------------------------------------------------------------------------------------------------------------------------------------------------------------------------------------------------------------------------------------------------------------------------------------------------------------------------------------------------------------------------------------------------------------------------------------------------------------------------------------------------------------------------------------------------------------------------------------------------------------------------------------------------------------------------------------------------------------------------------------------------------------------------------------------------------------------------------------------------------------------------------------------------------------------------------------------------------------------------------------------------------------------------------------------------------------------------------------------------------------------------------------------------------------------------------------------------------------------------------------------------------------------------------------------------------------------------------------------------------------------------------------------------------------------------------------------------------------------------------------------------------------------------------------------------------------------------------------------------------------------------------------------------------------------------------------------------------------------------------------------------------------------------------------------------------------------------------------------------------------------------------------------------------------------------------------------------------------------|
| LMIC    | TI = ((developing OR "less* developed" OR "third world" OR "under developed" OR "middle income" OR "low income" OR middle-income OR low-income OR underserved OR "under served" OR deprived OR poor*) NEAR/1 (count* OR nation* OR state* OR population) OR LMIC* OR poor OR deprived OR "South America" OR "Latin America*" OR "Central America*" OR Africa OR Asia) OR TS = ((developing OR "less* developed" OR "third world" OR "under developed" OR "middle income" OR "low income" OR middle-income OR low-income OR underserved OR "under served" OR deprived OR poor*) NEAR/1 (count* OR nation OR nations OR state OR states OR population) OR LMIC* OR poor OR deprived OR "South America*" OR "Latin America*" OR "Central America*" OR Africa* OR Asia*) OR TI = (Afghan* OR Albania* OR Algeria* OR "American Samoa*" OR Angola* OR "Antigua and Barbuda*" OR Argentin* OR Armenia* OR Azerbaijan* OR Bahrain* OR Bangladesh* OR Barbados* OR Belarus* OR Belize* OR Benin* OR Bhutan* OR Bolivia* OR Bosnia OR Herzegovin* OR "Bosnia and Herzegovina*" OR Botswana OR Batswana OR Brazil* OR Bulgaria* OR "Burkina*" OR Burma* OR Burundi* OR "Cape Verde*" OR "Cabo Verde*" OR Cambodia* OR Cameroon* OR "Central African Republic" OR "Central African*" OR Chad* OR Chile* OR Chin* OR Colombia* OR Comor* OR Congo* OR "Costa Rica*" OR "Côte d'Ivo*" OR "Cote d'Ivo*" OR Ivorian* OR Croatia* OR Cuba* OR "Czech" OR Djibouti* OR Dominica* OR Ecuador* OR Egypt* OR "Arab Rep*" OR "El Salvador*" OR "Equatorial Guinea*" OR Eritrea* OR Estonia* OR eSwatini OR IiSwati OR Ethiopia* OR Fiji* OR Gabon* OR The Gambia* OR Gambia* OR Georgia* OR Ghana* OR Grenad* OR Guatemala* OR Guinea* OR "Guinea-Bissau*" OR "Guinea Bissau*" OR Guyan* OR Haiti* OR Hondur* OR Hungar* OR India* OR Indonesia* OR Iran* OR "Islamic Rep*" OR Iraq* OR "Isle of Man*" OR Jamaica* OR Jordan* OR Kazakhstan* OR Kenya* OR Kiribati* OR Korea* OR Kosov* OR Kyrgyz* OR Lao* OR Latvia* OR Leban* OR Lesotho* OR Liberia* OR Libya* OR Lithuania* OR Madagascar* OR Malawi* OR Malaysia* OR Maldiv* OR Mali* OR Malt* OR "Marshall Island" OR Marshallese* OR Mauritania* OR Mauriti* OR Mayotte* OR Mexic* OR Micronesia* OR Moldova* OR Mongolia* OR Montenegr* OR Morocc* OR Mozambi* OR Myanmar* OR Namibia* OR Nauru* OR Nepal* OR Nicaragua* OR Niger* OR Nigeria* OR Macedonia* "Mariana Island*" OR Oman* OR Pakistan* OR Palau* OR Panama* OR "Papua New Guinea*" OR "New Guinea*" OR Paraguay* OR Peru* OR Philippin* OR Poland* OR Polish OR "Puerto Ric*" OR Romania* OR Russia* OR Rwanda* OR Samoa* OR "São Tomé and Príncipe*" OR "Sao Tome*" OR "Saudi Arabia*" OR Senegal* OR Serbia* OR "Serbia and Montenegr*" OR Seychell* OR "Sierra Leone*" OR Slovak* OR "Solomon Island*" OR Somali* OR "South Africa*" OR "South Sudan*" OR "Sri Lanka*" OR "Kitts and Nevis" OR Kittitian* OR Nevisian* OR "St Lucia*" OR "Saint Lucia*" OR "Vincent and the Grenadines" OR Vincentian* OR Sudan* OR Suriname* OR "Syrian Arab Rep*" OR Tajik* OR Tanzania* OR Thai* OR Timor* OR Leste* OR Togo* |

|               |                                                                                                                                                                                                                                                                                                                                                                                                                                                                                                                                                                                                                                                                                                                                                                                                                                                                                                                                                                                                                                                                                                                                                                                                                                                                                                                                                                                                                                                                                                                                                                                                                                                                                                                                                                                                                                                                                                                                                                                                                                                                                                                                                                                                                                                                                                                                                                                                                                                                                                                                                                                                                                                                                                                                                                                                                                                                                         |
|---------------|-----------------------------------------------------------------------------------------------------------------------------------------------------------------------------------------------------------------------------------------------------------------------------------------------------------------------------------------------------------------------------------------------------------------------------------------------------------------------------------------------------------------------------------------------------------------------------------------------------------------------------------------------------------------------------------------------------------------------------------------------------------------------------------------------------------------------------------------------------------------------------------------------------------------------------------------------------------------------------------------------------------------------------------------------------------------------------------------------------------------------------------------------------------------------------------------------------------------------------------------------------------------------------------------------------------------------------------------------------------------------------------------------------------------------------------------------------------------------------------------------------------------------------------------------------------------------------------------------------------------------------------------------------------------------------------------------------------------------------------------------------------------------------------------------------------------------------------------------------------------------------------------------------------------------------------------------------------------------------------------------------------------------------------------------------------------------------------------------------------------------------------------------------------------------------------------------------------------------------------------------------------------------------------------------------------------------------------------------------------------------------------------------------------------------------------------------------------------------------------------------------------------------------------------------------------------------------------------------------------------------------------------------------------------------------------------------------------------------------------------------------------------------------------------------------------------------------------------------------------------------------------------|
|               | <p>OR Tonga* OR Trinidad* OR Tobago* OR Tunisia* OR Turk* OR Turkmen* OR Tuvalu* OR Uganda* OR Ukrain* OR Uruguay* OR USSR* OR Uzbek* OR Vanuatu OR Ni-Vanuatu OR Venezuela* OR Vietnam* OR “West Bank*” OR Gaza* OR “Yemen*” OR Yugoslav* OR Zambia* OR Zimbabwe*) OR TS = (Afghan* OR Albania* OR Algeria* OR “American Samoa*” OR Angola* OR “Antigua and Barbuda*” OR Argentin* OR Armenia* OR Azerbaijan* OR Bahrain* OR Bangladesh* OR Barbados* OR Belarus* OR Belize* OR Benin* OR Bhutan* OR Bolivia* OR Bosnia OR Herzegovin* OR “Bosnia and Herzegovina*” OR Botswana OR Batswana OR Brazil* OR Bulgaria* OR “Burkina*” OR Burma* OR Burundi* OR “Cape Verde*” OR “Cabo Verde*” OR Cambodia* OR Cameroon* OR “Central African Republic” OR “Central African*” OR Chad* OR Chile* OR Chin* OR Colombia* OR Comor* OR Congo* OR “Costa Rica*” OR “Côte d'Ivo*” OR “Cote d'Ivo*” OR Ivorian* OR Croatia* OR Cuba* OR “Czech” OR Djibouti* OR Dominica* OR Ecuador* OR Egypt* OR “Arab Rep*” OR “El Salvador*” OR “Equatorial Guinea*” OR Eritrea* OR Estonia* OR eSwatini OR iSwati OR Ethiopia* OR Fiji* OR Gabon* OR The Gambia* OR Gambia* OR Georgia* OR Ghana* OR Grenad* OR Guatemala* OR Guinea* OR “Guinea-Bissau*” OR “Guinea Bissau*” OR Guyan* OR Haiti* OR Hondur* OR Hungar* OR India* OR Indonesia* OR Iran* OR “Islamic Rep*” OR Iraq* OR “Isle of Man*” OR Jamaica* OR Jordan* OR Kazakhstan* OR Kenya* OR Kiribati* OR Korea* OR Kosov* OR Kyrgyz* OR Lao* OR Latvia* OR Leban* OR Lesotho* OR Liberia* OR Libya* OR Lithuania* OR Madagascar* OR Malawi* OR Malaysia* OR Maldiv* OR Mali* OR Malt* OR “Marshall Island” OR Marshallese* OR Mauritania* OR Mauriti* OR Mayotte* OR Mexic* OR Micronesia* OR Moldova* OR Mongolia* OR Montenegr* OR Morocc* OR Mozambi* OR Myanmar* OR Namibia* OR Nauru* OR Nepal* OR Nicaragua* OR Niger* OR Nigeria* OR Macedonia* “Mariana Island*” OR Oman* OR Pakistan* OR Palau* OR Panama* OR “Papua New Guinea*” OR “New Guinea*” OR Paraguay* OR Peru* OR Philippin* OR Poland* OR Polish OR “Puerto Ric*” OR Romania* OR Russia* OR Rwanda* OR Samoa* OR “São Tomé and Príncipe*” OR “Sao Tome*” OR “Saudi Arabia*” OR Senegal* OR Serbia* OR “Serbia and Montenegr*” OR Seychell* OR “Sierra Leone*” OR Slovak* OR “Solomon Island*” OR Somali* OR “South Africa*” OR “South Sudan*” OR “Sri Lanka*” OR “Kitts and Nevis” OR Kittitian* OR Nevisian* OR “St Lucia*” OR “Saint Lucia*” OR “Vincent and the Grenadines” OR Vincentian* OR Sudan* OR Suriname* OR “Syrian Arab Rep*” OR Tajik* OR Tanzania* OR Thai* OR Timor* OR Leste* OR Togo* OR Tonga* OR Trinidad* OR Tobago* OR Tunisia* OR Turk* OR Turkmen* OR Tuvalu* OR Uganda* OR Ukrain* OR Uruguay* OR USSR* OR Uzbek* OR Vanuatu OR Ni-Vanuatu OR Venezuela* OR Vietnam* OR “West Bank*” OR Gaza* OR “Yemen*” OR Yugoslav* OR Zambia* OR Zimbabwe*)</p> |
| Cash transfer | <p>TI = (social NEAR/1 (assistance OR polic* OR welfare* OR protection) OR “poverty alleviation” OR “poverty reduction” OR (family NEAR/1 (polic* OR welfare)) OR (public NEAR/1 (assistance OR polic*))) OR “cash transfer” OR (conditional OR unconditional) NEAR/1 (“cash transfer”) OR conditional OR unconditional OR “maternal welfare” OR “financial support” OR “experimental social security” OR “poverty reduction scheme” OR (financial OR cash OR pay* OR monetary OR money) NEAR/1(transfer* OR measure* OR incentive* OR allowance* OR exclu* OR reform* OR gain* OR credit* OR benefit*)) OR TS = (social NEAR/1 (assistance OR polic* OR welfare* OR protection) OR “poverty alleviation” OR “poverty reduction” OR (family NEAR/1 (polic* OR welfare)) OR (public NEAR/1 (assistance OR polic*))) OR “cash transfer” OR (conditional OR unconditional) NEAR/1 (“cash transfer”) OR conditional OR unconditional OR “maternal welfare” OR “financial support” OR “experimental</p>                                                                                                                                                                                                                                                                                                                                                                                                                                                                                                                                                                                                                                                                                                                                                                                                                                                                                                                                                                                                                                                                                                                                                                                                                                                                                                                                                                                                                                                                                                                                                                                                                                                                                                                                                                                                                                                                                      |

|                   |                                                                                                                                                                                                                                                                                                                                                                                                                                                                                                                                                                                                                                                                                                                                                                                                                                                                                                                                                                                                                                                                                                                                                               |
|-------------------|---------------------------------------------------------------------------------------------------------------------------------------------------------------------------------------------------------------------------------------------------------------------------------------------------------------------------------------------------------------------------------------------------------------------------------------------------------------------------------------------------------------------------------------------------------------------------------------------------------------------------------------------------------------------------------------------------------------------------------------------------------------------------------------------------------------------------------------------------------------------------------------------------------------------------------------------------------------------------------------------------------------------------------------------------------------------------------------------------------------------------------------------------------------|
|                   | social security" OR "poverty reduction scheme" OR (financial OR cash OR pay* OR monetary OR money) NEAR/1(transfer* OR measure* OR incentive* OR allowance* OR exclu* OR reform* OR gain* OR credit* OR benefit*))                                                                                                                                                                                                                                                                                                                                                                                                                                                                                                                                                                                                                                                                                                                                                                                                                                                                                                                                            |
| Mental health     | TI = (mental NEAR/1 (health OR disorder* OR illness* OR problem*) OR "behaviour disorder*" OR "psychiatric mental disorder*" OR "psychiatric diagnos*" OR depression OR anxiety OR "personality disorder*" OR bipolar OR schizophrenia OR "mood disorder*" OR suicide* OR "eating disorder*" OR alcoholism OR "drinking behavi*" OR "drug taking" OR addiction OR "addictive behavi*" OR "positive mental health" OR wellbeing OR well-being OR self-esteem OR "self esteem" OR confidence) OR TS = (mental NEAR/1 (health OR disorder* OR illness* OR problem*) OR "behaviour disorder*" OR "psychiatric mental disorder*" OR "psychiatric diagnos*" OR depression OR anxiety OR "personality disorder*" OR bipolar OR schizophrenia OR "mood disorder*" OR suicid* OR "eating disorder*" OR alcoholism OR "drinking behavi*" OR "drug taking" OR addiction OR "addictive behavi*" OR "positive mental health" OR wellbeing OR well-being OR self-esteem OR "self esteem" OR confidence)                                                                                                                                                                     |
| Controlled design | TI = (random* OR placebo* OR ((single OR double OR triple OR treble) NEAR/1 (blind*)) OR single-blind* OR double-blind* OR longitud* OR "controlled before" OR "before and after" OR "repeat* measure*" OR "randomized* control* trial*" OR RCT* OR trial OR "follow-up assessment*" OR "follow up assessment*" OR "follow-up stud*" OR "follow up stud*" OR "secondary analys*" OR randomiz* OR ((intervention* OR treatment) NEAR/1 (evaluat* OR effect* OR outcome* OR stud*)) OR "evaluat* stud*" OR "cohort stud*" OR "compar* group*" OR "compar* stud*" OR "control group*") OR TS = (random* OR placebo* OR (single OR double OR triple OR treble) NEAR/1 (blind*) OR single-blind* OR double-blind* OR "controlled before" OR "before and after" OR "repeat* measure*" OR "randomized* control* trial*" OR "RCT*" OR trial OR "follow-up assessment*" OR "follow up assessment*" OR "follow-up stud*" OR "follow up stud*" OR "secondary analys*" OR randomiz* OR ((intervention* OR treatment) NEAR/1 (evaluat* OR effect* OR outcome* OR stud*)) OR "evaluat* stud*" OR "cohort stud*" OR "compar* group*" OR "compar* stud*" OR "control group*") |

**SciELO (Web of Science) from 2002 to present**

| Concept | Keywords                                                                                                                                                                                                                                                                                                                                                                                                                                                                                                                                                                                                                                                                                                                                                                                                                                                                                                                                                                                                                                                                                                                                                                                                                                               |
|---------|--------------------------------------------------------------------------------------------------------------------------------------------------------------------------------------------------------------------------------------------------------------------------------------------------------------------------------------------------------------------------------------------------------------------------------------------------------------------------------------------------------------------------------------------------------------------------------------------------------------------------------------------------------------------------------------------------------------------------------------------------------------------------------------------------------------------------------------------------------------------------------------------------------------------------------------------------------------------------------------------------------------------------------------------------------------------------------------------------------------------------------------------------------------------------------------------------------------------------------------------------------|
| LMIC    | TI = ((developing OR "less* developed" OR "third world" OR "under developed" OR "middle income" OR "low income" OR middle-income OR low-income OR underserved OR "under served" OR deprived OR poor*) NEAR/1 (count* OR nation* OR state* OR population) OR LMIC* OR poor OR deprived OR "South America" OR "Latin America*" OR "Central America*" OR Africa OR Asia) OR TS = ((developing OR "less* developed" OR "third world" OR "under developed" OR "middle income" OR "low income" OR middle-income OR low-income OR underserved OR "under served" OR deprived OR poor*) NEAR/1 (count* OR nation OR nations OR state OR states OR population) OR LMIC* OR poor OR deprived OR "South America*" OR "Latin America*" OR "Central America*" OR Africa* OR Asia*) OR TI = (Afghan* OR Albania* OR Algeria* OR "American Samoa*" OR Angola* OR "Antigua and Barbuda*" OR Argentin* OR Armenia* OR Azerbaijan* OR Bahrain* OR Bangladesh* OR Barbados* OR Belarus* OR Belize* OR Benin* OR Bhutan* OR Bolivia* OR Bosnia OR Herzegovin* OR "Bosnia and Herzegovina*" OR Botswana OR Batswana OR Brazil* OR Bulgaria* OR "Burkina*" OR Burma* OR Burundi* OR "Cape Verde*" OR "Cabo Verde*" OR Cambodia* OR Cameroon* OR "Central African Republic" OR |



“Central African\*” OR Chad\* OR Chile\* OR Chin\* OR Colombia\* OR Comor\* OR Congo\* OR “Costa Rica\*” OR “Côte d'Ivo\*” OR “Cote d'Ivo\*” OR Ivorian\* OR Croatia\* OR Cuba\* OR “Czech” OR Djibouti\* OR Dominica\* OR Ecuador\* OR Egypt\* OR “Arab Rep\*” OR “El Salvador\*” OR “Equatorial Guinea\*” OR Eritrea\* OR Estonia\* OR eSwatini OR IiSwati OR Ethiopia\* OR Fiji\* OR Gabon\* OR The Gambia\* OR Gambia\* OR Georgia\* OR Ghana\* OR Grenad\* OR Guatemala\* OR Guinea\* OR “Guinea-Bissau\*” OR “Guinea Bissau\*” OR Guyan\* OR Haiti\* OR Hondur\* OR Hungar\* OR India\* OR Indonesia\* OR Iran\* OR “Islamic Rep\*” OR Iraq\* OR “Isle of Man\*” OR Jamaica\* OR Jordan\* OR Kazakhstan\* OR Kenya\* OR Kiribati\* OR Korea\* OR Kosov\* OR Kyrgyz\* OR Lao\* OR Latvia\* OR Leban\* OR Lesotho\* OR Liberia\* OR Libya\* OR Lithuania\* OR Madagascar\* OR Malawi\* OR Malaysia\* OR Maldiv\* OR Mali\* OR Malt\* OR “Marshall Island” OR Marshallese\* OR Mauritania\* OR Mauriti\* OR Mayotte\* OR Mexic\* OR Micronesia\* OR Moldova\* OR Mongolia\* OR Montenegr\* OR Morocc\* OR Mozambi\* OR Myanmar\* OR Namibia\* OR Nauru\* OR Nepal\* OR Nicaragua\* OR Niger\* OR Nigeria\* OR Macedonia\* “Mariana Island\*” OR Oman\* OR Pakistan\* OR Palau\* OR Panama\* OR “Papua New Guinea\*” OR “New Guinea\*” OR Paraguay\* OR Peru\* OR Philippin\* OR Poland\* OR Polish OR “Puerto Ric\*” OR Romania\* OR Russia\* OR Rwanda\* OR Samoa\* OR “São Tomé and Príncipe\*” OR “Sao Tome\*” OR “Saudi Arabia\*” OR Senegal\* OR Serbia\* OR “Serbia and Montenegr\*” OR Seychell\* OR “Sierra Leone\*” OR Slovak\* OR “Solomon Island\*” OR Somali\* OR “South Africa\*” OR “South Sudan\*” OR “Sri Lanka\*” OR “Kitts and Nevis” OR Kittitian\* OR Nevisian\* OR “St Lucia\*” OR “Saint Lucia\*” OR “Vincent and the Grenadines” OR Vincentian\* OR Sudan\* OR Suriname\* OR “Syrian Arab Rep\*” OR Tajik\* OR Tanzania\* OR Thai\* OR Timor\* OR Leste\* OR Togo\* OR Tonga\* OR Trinidad\* OR Tobago\* OR Tunisia\* OR Turk\* OR Turkmen\* OR Tuvalu\* OR Uganda\* OR Ukrain\* OR Uruguay\* OR USSR\* OR Uzbek\* OR Vanuatu OR Ni-Vanuatu OR Venezuela\* OR Vietnam\* OR “West Bank\*” OR Gaza\* OR “Yemen\*” OR Yugoslav\* OR Zambia\* OR Zimbabwe\*) OR TS = (Afghan\* OR Albania\* OR Algeria\* OR “American Samoa\*” OR Angola\* OR “Antigua and Barbuda\*” OR Argentin\* OR Armenia\* OR Azerbaijan\* OR Bahrain\* OR Bangladesh\* OR Barbados\* OR Belarus\* OR Belize\* OR Benin\* OR Bhutan\* OR Bolivia\* OR Bosnia OR Herzegovin\* OR “Bosnia and Herzegovina\*” OR Botswana OR Batswana OR Brazil\* OR Bulgaria\* OR “Burkina\*” OR Burma\* OR Burundi\* OR “Cape Verde\*” OR “Cabo Verde\*” OR Cambodia\* OR Cameroon\* OR “Central African Republic” OR “Central African\*” OR Chad\* OR Chile\* OR Chin\* OR Colombia\* OR Comor\* OR Congo\* OR “Costa Rica\*” OR “Côte d'Ivo\*” OR “Cote d'Ivo\*” OR Ivorian\* OR Croatia\* OR Cuba\* OR “Czech” OR Djibouti\* OR Dominica\* OR Ecuador\* OR Egypt\* OR “Arab Rep\*” OR “El Salvador\*” OR “Equatorial Guinea\*” OR Eritrea\* OR Estonia\* OR eSwatini OR IiSwati OR Ethiopia\* OR Fiji\* OR Gabon\* OR The Gambia\* OR Gambia\* OR Georgia\* OR Ghana\* OR Grenad\* OR Guatemala\* OR Guinea\* OR “Guinea-Bissau\*” OR “Guinea Bissau\*” OR Guyan\* OR Haiti\* OR Hondur\* OR Hungar\* OR India\* OR Indonesia\* OR Iran\* OR “Islamic Rep\*” OR Iraq\* OR “Isle of Man\*” OR Jamaica\* OR Jordan\* OR Kazakhstan\* OR Kenya\* OR Kiribati\* OR Korea\* OR Kosov\* OR Kyrgyz\* OR Lao\* OR Latvia\* OR Leban\* OR Lesotho\* OR Liberia\* OR Libya\* OR Lithuania\* OR Madagascar\* OR Malawi\* OR Malaysia\* OR Maldiv\* OR Mali\* OR Malt\* OR “Marshall Island” OR Marshallese\* OR Mauritania\* OR Mauriti\* OR Mayotte\* OR Mexic\* OR Micronesia\* OR Moldova\* OR Mongolia\* OR Montenegr\* OR Morocc\* OR Mozambi\* OR Myanmar\* OR Namibia\* OR Nauru\* OR Nepal\* OR Nicaragua\* OR Niger\* OR Nigeria\* OR Macedonia\* “Mariana Island\*” OR

|                   |                                                                                                                                                                                                                                                                                                                                                                                                                                                                                                                                                                                                                                                                                                                                                                                                                                                                                                                                                                                                                                                                                                                                                                                                                                        |
|-------------------|----------------------------------------------------------------------------------------------------------------------------------------------------------------------------------------------------------------------------------------------------------------------------------------------------------------------------------------------------------------------------------------------------------------------------------------------------------------------------------------------------------------------------------------------------------------------------------------------------------------------------------------------------------------------------------------------------------------------------------------------------------------------------------------------------------------------------------------------------------------------------------------------------------------------------------------------------------------------------------------------------------------------------------------------------------------------------------------------------------------------------------------------------------------------------------------------------------------------------------------|
|                   | Oman* OR Pakistan* OR Palau* OR Panama* OR "Papua New Guinea*" OR "New Guinea*" OR Paraguay* OR Peru* OR Philippin* OR Poland* OR Polish OR "Puerto Ric*" OR Romania* OR Russia* OR Rwanda* OR Samoa* OR "São Tomé and Príncipe*" OR "Sao Tome*" OR "Saudi Arabia*" OR Senegal* OR Serbia* OR "Serbia and Montenegr*" OR Seychell* OR "Sierra Leone*" OR Slovak* OR "Solomon Island*" OR Somali* OR "South Africa*" OR "South Sudan*" OR "Sri Lanka*" OR "Kitts and Nevis" OR Kittitian* OR Nevisian* OR "St Lucia*" OR "Saint Lucia*" OR "Vincent and the Grenadines" OR Vincentian* OR Sudan* OR Suriname* OR "Syrian Arab Rep*" OR Tajik* OR Tanzania* OR Thai* OR Timor* OR Leste* OR Togo* OR Tonga* OR Trinidad* OR Tobago* OR Tunisia* OR Turk* OR Turkmen* OR Tuvalu* OR Uganda* OR Ukrain* OR Uruguay* OR USSR* OR Uzbek* OR Vanuatu OR Ni-Vanuatu OR Venezuela* OR Vietnam* OR "West Bank*" OR Gaza* OR "Yemen*" OR Yugoslav* OR Zambia* OR Zimbabwe*)                                                                                                                                                                                                                                                                       |
| Cash transfer     | TI = (longitud* OR social NEAR/1 (assistance OR polic* OR welfare* OR protection) OR "poverty alleviation" OR "poverty reduction" OR (family NEAR/1 (polic* OR welfare)) OR (public NEAR/1 (assistance OR polic*)) OR "cash transfer" OR (conditional OR unconditional) NEAR/1 ("cash transfer") OR conditional OR unconditional OR "maternal welfare" OR "financial support" OR "experimental social security" OR "poverty reduction scheme" OR (financial OR cash OR pay* OR monetary OR money) NEAR/1(transfer* OR measure* OR incentive* OR allowance* OR exclu* OR reform* OR gain* OR credit* OR benefit*)) OR TS = (longitud* OR social NEAR/1 (assistance OR polic* OR welfare* OR protection) OR "poverty alleviation" OR "poverty reduction" OR (family NEAR/1 (polic* OR welfare)) OR (public NEAR/1 (assistance OR polic*)) OR "cash transfer" OR (conditional OR unconditional) NEAR/1 ("cash transfer") OR conditional OR unconditional OR "maternal welfare" OR "financial support" OR "experimental social security" OR "poverty reduction scheme" OR (financial OR cash OR pay* OR monetary OR money) NEAR/1(transfer* OR measure* OR incentive* OR allowance* OR exclu* OR reform* OR gain* OR credit* OR benefit*)) |
| Mental health     | TI = (mental NEAR/1 (health OR disorder* OR illness* OR problem*) OR "behaviour disorder*" OR "psychiatric mental disorder*" OR "psychiatric diagnos*" OR depression OR suicid* OR anxiety OR "personality disorder*" OR bipolar OR schizophrenia OR "mood disorder*" OR "eating disorder*" OR alcoholism OR "drinking behavi*" OR "drug taking" OR addiction OR "addictive behavi*" OR "positive mental health" OR wellbeing OR well-being OR self-esteem OR "self esteem" OR confidence) OR TS = (mental NEAR/1 (health OR disorder* OR illness* OR problem*) OR "behaviour disorder*" OR "psychiatric mental disorder*" OR "psychiatric diagnos*" OR depression OR suicid* OR anxiety OR "personality disorder*" OR bipolar OR schizophrenia OR "mood disorder*" OR "eating disorder*" OR alcoholism OR "drinking behavi*" OR "drug taking" OR addiction OR "addictive behavi*" OR "positive mental health" OR wellbeing OR well-being OR self-esteem OR "self esteem" OR confidence)                                                                                                                                                                                                                                               |
| Controlled design | TI = (longitud* OR random* OR placebo* OR ((single OR double OR triple OR treble) NEAR/1 (blind*)) OR single-blind* OR double-blind* OR "controlled before" OR "before and after" OR "repeat* measure*" OR "randomized* control* trial*" OR RCT* OR trial OR "follow-up assessment*" OR "follow up assessment*" OR "follow-up stud*" OR "follow up stud*" OR "secondary analys*" OR randomiz* OR ((intervention* OR treatment) NEAR/1 (evaluat* OR effect* OR outcome* OR stud*)) OR "evaluat* stud*" OR "cohort stud*" OR "compar* group*" OR "compar* stud*" OR "control group*") OR TS = (longitud* OR random* OR placebo* OR (single OR double                                                                                                                                                                                                                                                                                                                                                                                                                                                                                                                                                                                     |

|  |                                                                                                                                                                                                                                                                                                                                                                                                                                                                                                                         |
|--|-------------------------------------------------------------------------------------------------------------------------------------------------------------------------------------------------------------------------------------------------------------------------------------------------------------------------------------------------------------------------------------------------------------------------------------------------------------------------------------------------------------------------|
|  | OR triple OR treble) NEAR/1 (blind*) OR single-blind* OR double-blind* OR "controlled before" OR "before and after" OR "repeat* measure*" OR "randomized* control* trial*" OR "RCT*" OR trial OR "follow-up assessment*" OR "follow up assessment*" OR "follow-up stud*" OR "follow up stud*" OR "secondary analys*" OR randomiz* OR ((intervention* OR treatment) NEAR/1 (evaluat* OR effect* OR outcome* OR stud*)) OR "evaluat* stud*" OR "cohort stud*" OR "compar* group*" OR "compar* stud*" OR "control group*") |
|--|-------------------------------------------------------------------------------------------------------------------------------------------------------------------------------------------------------------------------------------------------------------------------------------------------------------------------------------------------------------------------------------------------------------------------------------------------------------------------------------------------------------------------|

### Google Scholar

In addition, we did a specific structured search of Google Scholar over the period between 2020 and 2000. Our search terms could appear anywhere in article, potentially therefore looking for these terms in the full text of reports. We broke our search down into 5 year time frames, and for each time frame looked at the first 500 records retrieved. All results were sorted by relevance. This meant that we for each search strategy we looked at 2000 records, e.g. the first 500 from 2000 to 2004, 2005 to 2009, 2010 to 2015, 2016-2020. In total we examined 5664 records for the four searches, but many of the articles we considered would have appeared in multiple searches. So the number of unique records examined will be lower. DMD and ALP both screened all records although we did this on slightly different days so the set of records might have varied slightly. In all cases as true double screening was not practical we included records where at least one reviewer had indicated inclusion.

The following limited searches were used in the advanced search function in Google Scholar:

Cash Transfer\* AND Mental Health and Adolesce\* (2060 FOR 2015 – 2020, 845 FOR 2010-2014, 193 FOR 2005-2009 – 62 FOR 2000-2004)

Cash Transfer\* AND Mental Health and Youth\* (3,100 FOR 2015- 2020, 1320 FOR 2010 – 2014, 355 FOR 2005-2009 – 131 FOR 2000-2004)

Cash Transfer\* AND Mental Health and Child\* 3,570 FOR 2015 – 2020, 1,520 FOR 2010 – 2014, 453 FOR 2005-2009 – 155 FOR 2000-2004)

Cash Transfer\* AND Mental Health and Teenage\* (2,190 FOR 2015 – 2020, 909 FOR 2010 – 2014, 233 FOR 2005-2009 – 82 FOR 2000-2004)

### EconPapers

We also conducted structured searches through the EconPapers database that catalogues journal articles and working papers. A number of different searches were run and 1,675 records were examined. The number of records screened with each search is listed below:

Cash Transfer(s) AND Mental in Freetext [47]

Social Assistance and Mental [32]

Social Assistance and RCT [6]

Social Policy AND Mental [88]

Mental Health and RCT [23]

Cash Transfer and Depression [19]

Social Polic\* and Mental Health [62]

“social welfare” AND “mental” [50]

“social protection” AND “mental” [20]

“poverty” AND mental [517]

Transfers AND mental [305]

Mone\* AND mental [390]

Cash AND mental [120]

### Details of data extraction

*Study eligibility:* Data required to assess eligibility according to inclusion criteria.

*Study details:* Study authors, publication date, objectives, country, number of participants, designs and methods.

*Intervention details:* Including group names and intervention arms, (as well as who received the intervention and control). Where available, we also extracted details on context and implementation. This included the design of the intervention, the cost of the intervention, the duration, its generosity (e.g. assessed by the percentage contribution of an average income from the intervention to the national average total income), population coverage and who received the money (e.g. men or women).

*Participant details:* Sex, age, ethnicity, follow up times.

*Outcomes:* Mental health (i.e. self-report measures or diagnosis of positive and negative mental health outcomes), who completed the measure (child, caregiver, clinician), length of follow up.

*Results:* Including overall results of intervention, and effect on mental health outcomes.

*Potential confounders:* These included key sociodemographic characteristics of participants, including education, poverty (measured using the outcomes included in the study, such as household education, income, employment, health, access to public utilities, material possessions and housing conditions or multidimensional poverty index), social status, immigration status, ethnicity, gender, gender identity, geographic residency, labour force participation, place of residency, sexual orientation, socioeconomic status, social status and religious affiliation.
